# **Deletion of Stim1 in hypothalamic arcuate nucleus Kiss1 neurons potentiates synchronous GCaMP activity and protects against diet-induced obesity**

**Jian Qiu<sup>a</sup>, Todd L. Stincic<sup>a</sup>, Martha A. Bosch<sup>a</sup>, Ashley M. Connors<sup>a</sup>, Stefanie Kaech Petrie<sup>b</sup>, Oline K. Rønnekleiv<sup>a,c</sup>, Martin J. Kelly<sup>a,c</sup>**

Abbreviated title: Deletion of Stim1 of arcuate Kiss1 neurons potentiates the synchronous GCaMP6 activity

<sup>a</sup>Department of Chemical Physiology and Biochemistry, Oregon Health and Science University, Portland, United States

<sup>b</sup>Jungers Center for Neurosciences Research, Oregon Health and Science University, Portland, United States

<sup>c</sup>Division of Neuroscience, Oregon National Primate Research Center, Oregon Health and Science University, Beaverton, United States

Co-corresponding Authors:

Jian Qiu, Ph.D. and Martin J. Kelly, Ph.D.

Department of Chemical Physiology and Biochemistry

Oregon Health and Science University

3181 SW Sam Jackson Park Road

Portland, Oregon, 97239, United States

Tel: 503-494-5835

E-mail: [qiuj@ohsu.edu](mailto:qiuj@ohsu.edu) or [kellym@ohsu.edu](mailto:kellym@ohsu.edu)

Number of Pages:

Number of Figures: 7, Tables: 1, multimedia: 2,

Number of words for abstract: 250, introduction: 650, and discussion: 1500.

Conflict of interest statement: The authors declare that no competing interests exist.

Acknowledgements: This research was funded by National Institute of Health (NIH) grants: R01-NS043330 (OKR), R01-NS038809 (MJK) and R01-DK068098 (OKR and MJK). Confocal microscopy was supported by a P30 NS061800 (PI, S Aicher) grant. We thank Mr. Daniel Johnson for his technical support.

## 1 **Abstract**

2 Kisspeptin (Kiss1) neurons are essential for reproduction, but their role in the control of energy balance and other  
3 homeostatic functions remains unclear. High frequency firing of hypothalamic arcuate Kiss1 (Kiss1<sup>ARH</sup>) neurons  
4 releases kisspeptin into the median eminence, and neurokinin B (NKB) and dynorphin onto neighboring Kiss1<sup>ARH</sup>  
5 neurons to generate a slow excitatory postsynaptic potential (EPSP) mediated by TRPC5 channels that entrains  
6 intermittent, synchronous firing of Kiss1<sup>ARH</sup> neurons. High frequency optogenetic stimulation of Kiss1<sup>ARH</sup> neurons  
7 releases glutamate to excite the anorexigenic proopiomelanocortin (POMC) neurons and inhibit the orexigenic  
8 neuropeptide Y/agouti-related peptide (AgRP) neurons via metabotropic glutamate receptors. At the molecular  
9 level, the endoplasmic reticulum calcium-sensing protein stromal interaction molecule 1 (STIM1) is critically  
10 involved in the regulation of neuronal Ca<sup>2+</sup> signaling and neuronal excitability through its interaction with plasma  
11 membrane calcium (e.g., TRPC) channels. 17 $\beta$ -estradiol (E2) downregulates *Stim1* mRNA expression in female  
12 arcuate neurons. Therefore, we hypothesized that deletion of *Stim1* in Kiss1<sup>ARH</sup> neurons would increase neuronal  
13 excitability and their synchronous firing, which ultimately would affect energy homeostasis. Using optogenetics  
14 in combination with whole-cell recording and GCaMP6 imaging in slices, we discovered that the deletion of *Stim1*  
15 in Kiss1 neurons significantly increased the amplitude of the slow EPSP and augmented synchronous [Ca<sup>2+</sup>]<sub>i</sub>  
16 oscillations in Kiss1<sup>ARH</sup> neurons. Deletion of *Stim1* in Kiss1<sup>ARH</sup> neurons amplified the actions of NKB and  
17 protected ovariectomized female mice from developing obesity and glucose intolerance with high-fat dieting.  
18 Therefore, STIM1 appears to play a critical role in regulating synchronous firing of Kiss1<sup>ARH</sup> neurons, which  
19 ultimately affects energy homeostasis.

## 20 **Significance Statement**

21 Hypothalamic arcuate kisspeptin (Kiss1<sup>ARH</sup>) neurons are essential for stimulating the pulsatile release of  
22 gonadotropin releasing hormone (GnRH) and maintaining fertility. However, Kiss1<sup>ARH</sup> neurons appear to be a  
23 key player in coordinating energy balance with reproduction. The regulation of calcium channels and hence  
24 calcium signaling is critically dependent on the endoplasmic reticulum calcium-sensing protein stromal  
25 interaction molecule 1 (STIM1), which interacts with the plasma membrane calcium channels. We have  
26 conditionally deleted *Stim1* in Kiss1<sup>ARH</sup> neurons and found that it significantly increased the excitability of

27 Kiss1<sup>ARH</sup> neurons and protected ovariectomized female mice from developing obesity and glucose intolerance  
28 with high-fat dieting.

29

30

## 31 **Introduction**

32 Nutrition and reproduction are inextricably linked across all mammalian species, *i.e.*, high circulating  
33 concentrations of 17 $\beta$ -estradiol (E2) during the late follicular phase of the reproductive cycle correlate with  
34 reduced food intake (Czaja, 1978; Asarian and Geary, 2006; Roepke et al., 2010). However, we are just  
35 beginning to understand the central mechanisms by which E2 feedback coordinates reproduction and energy  
36 balance (Castellano and Tena-Sempere, 2013; Nestor et al., 2014; Navarro, 2020). Kisspeptin neurons in the  
37 hypothalamic arcuate nucleus (Kiss1<sup>ARH</sup> neurons) appear to be critical for coordinating these two homeostatic  
38 processes. Firstly, Kiss1 and its G protein-coupled receptor (GPR54) are essential for pubertal development  
39 and reproductive function (Kuohung and Kaiser, 2006). Mutations in Kiss1 or GPR54 cause hypogonadotropic  
40 hypogonadism in humans (De Roux et al., 2003; Seminara et al., 2003; Topaloglu et al., 2012), and deletion of  
41 Kiss1 or GPR54 causes defective sexual development and reproductive failure in mice (Seminara et al., 2003;  
42 d'Anglemont de Tassigny et al., 2007). These effects on fertility are directly dependent on Kiss1/GPR54 signaling  
43 in gonadotropin-releasing hormone (GnRH) neurons (Han et al., 2005; Pielecka-Fortuna et al., 2008; Zhang et  
44 al., 2008). Moreover, Kiss1 signaling appears to be also important for normal metabolism and glucose  
45 homeostasis. GPR54 deletion in female, but not male, mice causes severe obesity, reduced metabolism, glucose  
46 intolerance and hyperleptinemia (Tolson et al., 2014; Tolson et al., 2019). Also, Kiss1<sup>ARH</sup> neurons are directly  
47 depolarized/excited by leptin (Qiu et al., 2011) and insulin (Qiu et al., 2014), so they are quite possibly the key  
48 neurons involved in conveying metabolic information to GnRH neurons.

49

50 High frequency optogenetic stimulation of Kiss1<sup>ARH</sup> neurons expressing channel rhodopsin (ChR2) generates  
51 pulsatile release of LH (Clarkson et al., 2017). Kiss1<sup>ARH</sup> neurons co-express neurokinin B (NKB) and dynorphin  
52 (Goodman et al., 2007; Navarro et al., 2009) and high-frequency firing (10-20 Hz) of these neurons co-releases  
53 NKB and dynorphin to coordinate the synchronous firing of the whole population of Kiss1<sup>ARH</sup> neurons (Qiu et al.,

54 2016). NKB binds to tachykinin 3 receptor (TacR3) in neighboring Kiss1<sup>ARH</sup> neurons to activate canonical  
55 transient receptor potential 5 (TRPC5) channels to cause a robust depolarization (slow EPSP), whereas co-  
56 released dynorphin feeds back to bind to presynaptic  $\kappa$ -opioid receptors to limit the release of NKB to discrete  
57 bursts of activity (Qiu et al., 2016). The co-release of the two peptide neurotransmitters coordinates the  
58 synchronous firing of Kiss1<sup>ARH</sup> neurons that drives the pulsatile release of GnRH into the median eminence (Qiu  
59 et al., 2016; Clarkson et al., 2017).

60

61 The activity of TRPC channels is modulated by stromal-interaction molecule 1 (STIM1), which is localized  
62 to the endoplasmic reticulum (ER) membrane of cells, and its N-terminal domain contains an EF-hand that  
63 senses changes in ER calcium concentrations and maintains intracellular Ca<sup>2+</sup> homeostasis through store-  
64 operated Ca<sup>2+</sup> entry (SOCE) (Salido et al., 2011). Upon depletion of ER Ca<sup>2+</sup>, STIM1 oligomerizes and then  
65 interacts with plasma membrane calcium (TRPC) channels (Yuan et al., 2007; Salido et al., 2011).  
66 Phosphorylation of STIM1 is required for oligomerization, and E2 inhibits the phosphorylation of STIM1 and its  
67 interaction with plasma membrane Orai and TRPC channels and hence store-operated Ca<sup>2+</sup> entry (Yuan et al.,  
68 2007; Salido et al., 2011). Under normal physiological conditions, TRPC5 channels are coupled to plasma  
69 membrane receptors (Qiu et al., 2010; Qiu et al., 2014; Gao et al., 2017), but in cellular stressed states (e.g.,  
70 inflammation, obesity) TRPC5 channels may associate with STIM1 to replenish ER Ca<sup>2+</sup> stores (Birnbaumer, 2009;  
71 Qiu et al., 2018b). E2 maintains the excitatory effects of insulin in POMC neurons, mediated by TRPC5 channel  
72 opening, by downregulating *Stim1* expression, thereby protecting against insulin resistance in obese females  
73 (Qiu et al., 2018b). E2 also downregulates *Stim1* expression in the ARH of female guinea pigs, indicating that  
74 this interaction is more widespread in the ARH. Therefore, we hypothesized that deletion of *Stim1* in Kiss1<sup>ARH</sup>  
75 neurons would augment TacR3 mediated depolarization via TRPC5 channels to ultimately drive synchronous  
76 firing of the “pulse generator Kiss1<sup>ARH</sup> neurons.

77

## 78 **Materials and Methods**

79

80 *Animals*

81

82 All animal procedures were conducted at Oregon Health and Science University (OHSU) according to the  
83 National Institutes of Health Guide for the Care and Use of Laboratory Animals and with approval from the OHSU  
84 Animal Care and Use Committee.

85

86 We used female mice in all of the experiments. *Kiss1<sup>Cre:GFP</sup>* (v2) mice (Dr. Richard D. Palmiter; University of  
87 Washington; PMID: 29336844) (Padilla et al., 2018) were housed under constant temperature (21–23°C) and  
88 12-h light, 12-h dark cycle schedule (lights on at 0600 and lights off at 1800 h), with free access to food (Lab  
89 Diets 5L0D) and water. *Kiss1<sup>Cre:GFP</sup>* mice were used for viral injection to express ChR2 or GCaMP6s in *Kiss1<sup>ARH</sup>*  
90 neurons or they were crossed with heterozygous *Ai32* mice (RRID:IMSR\_JAX:024109, C57BL/6 background)  
91 purchased from The Jackson Laboratory. These *Ai32* mice carry the ChR2 (H134R)–EYFP gene in their  
92 Gt(ROSA)26Sor locus (Madisen et al., 2012). The gene is separated from its CAG promoter by a loxP-flanked  
93 transcriptional STOP cassette, allowing its expression in a Cre-dependent manner. To test for this we dispersed  
94 and harvested EYFP neurons in the ARH from *Kiss1<sup>Cre:GFP::Ai32</sup>* females and used single cell RT-PCR to  
95 determine *Kiss1* mRNA expression as described below and according to previous published methods (Bosch et  
96 al., 2013). Data from 126 ARH<sup>EYFP</sup> neurons from 6 *Kiss1<sup>Cre:GFP::Ai32</sup>* females documented that 99% of the EYFP  
97 neurons expressed *Kiss1*.

98

99 To generate mice with conditional knockout of *Stim1* in *Kiss1* neurons (*Stim1<sup>KKO</sup>*), we first crossed *Kiss1<sup>Cre/+</sup>*  
100 (v2) males (Padilla et al., 2018) with *Stim1<sup>loxP/loxP</sup>* females (Jackson Laboratory Stock #023350,  
101 RRID:IMSR\_JAX:023350, (Oh-hora et al., 2008)). This cross knocks out *Stim1* through excising exon 2 (Oh-  
102 hora et al., 2008) of the floxed *Stim1* gene in cells in which Cre is expressed under the control of a promoter  
103 specific for the expression of *Kiss1* (Padilla et al., 2018; Qiu et al., 2018a). The F1 mice produced were  
104 *Kiss1<sup>Cre/+::Stim1<sup>+/lox</sup></sup>* and *Stim1<sup>+/lox</sup>*. The F2 mice were generated by crossing these *Kiss1<sup>Cre/+::Stim1<sup>+/lox</sup></sup>* males  
105 with *Stim1<sup>loxP/lox</sup>* females. Approximately 25% of the offspring were *Kiss1<sup>Cre/+::Stim1<sup>lox/lox</sup></sup>* such that *Stim1* was  
106 deleted in *Kiss1* cells (*Stim1<sup>KKO</sup>*), and all the *Stim1* knock-out mice were seen at the expected frequency and  
107 viable throughout adulthood. We used *Kiss1<sup>Cre/+</sup>* mice as controls. To increase the yield of *Stim1* knock-out mice,

108 we crossed Kiss1<sup>Cre/+</sup>::Stim1<sup>lox/lox</sup> males with Stim1<sup>lox/lox</sup> females. We maintained not only this strain but also the  
109 Kiss1<sup>Cre/+</sup> strain at the same time. Genotypes for *Stim1* were determined using forward primer JAX#18885 (5'-  
110 CGA TGG TCT CAC GGT CTC TA-3') and reverse primer JAX#18886 (5'-GCT CTG CTG ACC TGG AAC TA-  
111 3'), which distinguished between lox/lox, lox/+, and +/+ genotypes. Cre genotypes were determined using  
112 forward primer 5'-GCG GTC TGG CAG TAA AAA CTA TC3'- and reverse primer 5'-TTC CAT GAG TGA ACG  
113 AAC CTG G-3', which distinguished between carriers and non-carriers of the Cre allele.

### 114 115 116 *Puberty onset and estrous cyclicity*

117 To determine whether deleting *Stim1* in Kiss1-expressing neurons might impact fertility, we evaluated female  
118 *Stim1<sup>kk0</sup>* mice and wild type (WT) female littermates for pubertal onset and estrous cyclicity. For breeding, male  
119 and female mice were mated at 1:1, and the number of pups per litter was counted. The *Stim1<sup>kk0</sup>* mice showed  
120 similar fecundity as control mice. Puberty onset in females was assessed by monitoring for vaginal opening daily  
121 between 0900 and 1000 hr starting at 3 weeks of age. For estrous cycle studies, *Stim1<sup>kk0</sup>* and *Kiss1<sup>Cre:GFP</sup>* female  
122 mice were group housed and were habituated to handling for at least one week by the same investigator prior to  
123 estrous cycle monitoring. Vaginal lavage was performed daily for 13 consecutive days between 0900 and 1000  
124 hr. Cytology was evaluated using a light microscope and scored as diestrus, proestrus or estrus as previously  
125 described (Qiu et al., 2018a). The Number of estrous and diestrous days were counted for each animal and used  
126 for statistical analysis (Mann-Whitney U-test).

### 127 128 *Gonadectomy*

129 At least 7 days prior to each experiment, ovaries were removed as described previously while under inhalant  
130 isoflurane anesthesia (Piramal Enterprises Limited, Andhra Pradesh, India) (Qiu et al., 2018a). Each mouse  
131 received analgesia (Carprofen; 5mg/kg; subcutaneous) immediately after a surgery for relief of postoperative  
132 pain.

### 133 134 *Metabolic Studies*

135 For the metabolic studies, *Stim1<sup>kkO</sup>* and *Kiss1* littermate control females were ovariectomized at 2-4 months  
136 of age and put on a high fat diet (HFD; 45% kcal from fat; Research Diets, New Brunswick, NJ; D12451) for eight  
137 weeks. Mice were group housed (because of COVID-19 restrictions) and individually weighed every week. The  
138 evening prior to the glucose tolerance test (GTT), all mice were assessed for body composition (fat and lean  
139 mass) using an EchoMRI 4-in-1-500 Body Composition Analyzer (Houston, TX).

140  
141 For GTT, age matched *Kiss1<sup>Cre</sup>* and *Stim1<sup>kkO</sup>* mice were fasted overnight for 15-h, and baseline glucose  
142 levels measured with the aid of an Accu-Check Advantage blood glucose meter (Roche) using blood collected  
143 from the tail vein. All mice were then injected intraperitoneally with glucose (1 mg/g lean mass as determined by  
144 EchoMRI) in sterile PBS and blood glucose levels were measured 15, 30, 60, 90, and 120 min after injection.  
145 The glucose clearance (area under the curve) was calculated based on the glucose baseline levels at 0 min  
146 (Ayala et al., 2010).

#### 147 148 149 *AAV delivery to Kiss1<sup>Cre:GFP</sup> and Stim1<sup>kkO</sup> mice*

150 Fourteen to twenty-one days prior to each experiment, *Kiss1<sup>Cre:GFP</sup>* mice or *Stim1<sup>kkO</sup>* mice (>60 days old)  
151 received bilateral ARH injections of a Cre-dependent adeno-associated viral (AAV; serotype 1) vector encoding  
152 ChR2-mCherry (AAV1-Ef1a-DIO-ChR2: mCherry) or ChR2-YFP (AAV1-Ef1a-DIO-ChR2:YFP, Dr. Stephanie L.  
153 Padilla; University of Washington; PMID: 25429312) or GCaMP6s (AAV9-Syn-Flex-GCaMP6s-WPRE-SV40;  
154 Addgene, # 100845-AAV9). Using aseptic techniques, anesthetized female mice (1.5% isoflurane/O<sub>2</sub>) received  
155 a medial skin incision to expose the surface of the skull. The glass pipette (Drummond Scientific #3-000-203-  
156 G/X; Broomall, PA) with a beveled tip (diameter = 45 μm) was filled with mineral oil, loaded with an aliquot of  
157 AAV using a Nanoject II (Drummond Scientific). ARH injection coordinates were anteroposterior (AP): -1.20 mm,  
158 mediolateral (ML): ± 0.30 mm, dorsoventral (DL): -5.80 mm (surface of brain z = 0.0 mm); 500 nl of the AAV  
159 (2.0 x 10<sup>12</sup> particles/ml) was injected (100 nl/min) into each position, left in place for 10 min post-injection, then  
160 the pipette was slowly removed from the brain. The skin incision was closed using skin adhesive, and each  
161 mouse received analgesia (Carprofen; 5 mg/kg) for two days post-operation.

162

163 *Electrophysiology*

164 Coronal brain slices (250  $\mu\text{m}$ ) containing the ARH from gonadectomized females were prepared as  
165 previously described (Qiu et al., 2003). Whole-cell, patch recordings were performed in voltage clamp and  
166 current clamp using an Olympus BX51W1 upright microscope equipped with video-enhanced, infrared-  
167 differential interference contrast (IR-DIC) and an Exfo X-Cite 120 Series fluorescence light source. Electrodes  
168 were fabricated from borosilicate glass (1.5 mm outer diameter; World Precision Instruments, Sarasota, FL) and  
169 filled with a normal internal solution (in mM): 128 potassium gluconate, 10 NaCl, 1 MgCl<sub>2</sub>, 11 EGTA, 10 HEPES,  
170 3 ATP, and 0.25 GTP (pH was adjusted to 7.3–7.4 with 1N KOH, 290–300 mOsm). Pipette resistances ranged  
171 from 3–5 M $\Omega$ . In whole cell configuration, access resistance was less than 20 M $\Omega$ ; access resistance was 80%  
172 compensated. For some experiments measuring the ramp current–voltage (I–V) relationship, K<sup>+</sup>-gluconate in the  
173 normal internal solution was replaced with Cs<sup>+</sup>-gluconate (pH 7.35 with CsOH), and the extracellular solution  
174 contained Na<sup>+</sup>, K<sup>+</sup>, I<sub>h</sub> (HCN), Ca<sup>2+</sup>, and GABA<sub>A</sub> channel blockers (in mM: NaCl, 126; 4-aminopyridine, 5; KCl, 2.5;  
175 MgCl<sub>2</sub>, 1.2; CsCl, 2; CaCl<sub>2</sub>, 1.4; CoCl<sub>2</sub>, 1; nifedipine, 0.01; HEPES, 20; NaOH, 8; glucose, 10; tetrodotoxin, 0.001;  
176 picrotoxin, 0.1). For optogenetic stimulation, a light-induced response was evoked using a light-emitting diode  
177 (LED) 470 nm blue light source controlled by a variable 2A driver (ThorLabs, Newton, NJ) with the light path  
178 delivered directly through an Olympus 40 water-immersion lens. High fidelity response to light (470 nm)  
179 stimulation of Kiss1<sup>ARH</sup>::ChR2-mCherry expressing neurons was observed, and both evoked inward currents (in  
180 voltage clamp,  $V_{\text{hold}} = -60$  mV) or depolarization (in current clamp) were measured. Electrophysiological signals  
181 were amplified with an Axopatch 200A and digitized with Digidata 1322A (Molecular Devices, Foster City, CA),  
182 and the data were analyzed using p-Clamp software (RRID:SCR\_011323, version 9.2, Molecular Devices). The  
183 amplitude of the slow EPSP was measured after low pass filtering in order to eliminate the barrage of action  
184 potentials riding on the depolarization. The liquid junction potential was corrected for all data analysis.

185

186 *Calcium imaging*

187 For calcium imaging, brain slices were placed in a RC-22C slide recording chamber (Harvard/Warner  
188 Instruments) and imaged on an inverted Nikon TiE microscope equipped with a Yokogawa CSU-W1 spinning



189 disk confocal head, integrated under NIS Elements v4.20 (Nikon). The preparation, kept at 32°C via a cage  
190 incubator (Okolab), was continuously perfused with oxygenated aCSF at a flow rate of 1.25 ml/min. Images were  
191 acquired on a Zyla v5.5 sCMOS camera (Andor) at 0.5 Hz. frame-rate, through an 10 x (NA 0.45) or 20 x (NA  
192 0.75) objective, combining 488 nm laser excitation with 500–550 nm emission collection. A single focal plane (z-  
193 axis) was maintained using the Nikon Perfect Focus System. Minor tissue drift in the x-y axis was corrected  
194 using NIS Elements. Imaging displaying major drift were excluded from final analysis. Changes in Kiss1<sup>ARH</sup>  
195 neuron Ca<sup>2+</sup> levels were measured in regions of interest (ROIs) comprising the GCaMP6s-positive cell bodies.  
196 In all recordings, background fluorescence measured in an ROI drawn on nearby tissue was subtracted from  
197 every ROI. [Ca<sup>2+</sup>]<sub>i</sub> variations after drug applications were assessed as changes in fluorescence signals over  
198 baseline ( $\Delta F/F_0$ ). To normalize the fluorescence value of each cell, we first separated experimental trials into  
199 two parts: a baseline period (2 min) corresponding to all the frames recorded before addition of drugs, and a  
200 stimulus period, after the onset of the drug (such as bath-applied senktide) application and lasting several  
201 minutes. Next, for each ROI we calculated  $\Delta F/F_0$  for each frame (t), where  $\Delta F/F_0$  equals  $(F_{(t)} - F_0)/F_0$ , and  $F_0$  was  
202 the mean fluorescence value for that ROI for all frames in the baseline period for that trial. The area under the  
203 curve (AUC) was calculated over the time periods of 2 min before and 18 min after drug application. Maximal  
204 peak reached after drug application was also measured and used in quantitative analysis. Data were averaged  
205 across all Kiss1<sup>ARH</sup> neurons in a slice (two slices per animal), which were used as the statistical unit over a  
206 minimum of 3 animals per condition.

### 207 208 *Single cell RT-PCR (scRT-PCR)*

209 Coronal brain sections from the ARH of three female *Stim1<sup>tko</sup>* and three *Kiss1<sup>Cre:GFP::Ai32</sup>* mice were prepared  
210 for electrophysiology and scRT-PCR. The 3-4 slices obtained were divided between electrophysiological  
211 recording experiments and single cell harvesting. Single cell dispersion and harvesting was performed as  
212 described previously with some modifications as described below (Bosch et al., 2013; Zhang et al., 2013b).  
213 Briefly, the ARH was dissected and digested in papain (7mg/ml in aCSF, Sigma-Aldrich). Gentle trituration using  
214 varying sizes of flame polished Pasteur pipets were used to disperse the cells and then they were plated onto a  
215 glass bottom dish. A constant flow of oxygenated aCSF (NaCl, 125 mM; KCl, 5 mM; NaH<sub>2</sub>PO<sub>4</sub>, 1.44 mM; Hepes,

5 mM; D-glucose, 10 mM; NaHCO<sub>3</sub>, 26 mM; MgSO<sub>4</sub>·7H<sub>2</sub>O, 2 mM; CaCl<sub>2</sub>, 2 mM) was applied to the dish to keep the cells healthy and to clear debris. Fluorescent neurons were visualized under an inverted microscope. The Xenoworks Microinjection system (Sutter Instruments) was used to manipulate a 10 μm tip size glass capillary tube to approach single neurons, apply gently suction and harvest single cells or pools of 10 cells into a siliconized tube containing a solution of 1X Invitrogen Superscript III Buffer (LifeTech), 15U of RNasin (Promega), 10 mM of dithiothreitol (DTT) and diethylpyrocarbonate (DEPC)-treated water in a total of 5 μl for single cells or 8 μl for pools of 10 cells. Corresponding controls were collected at the same time including single neurons (processed without reverse transcriptase) and aCSF from the surrounding area. Hypothalamic tissue RNA was also processed with and without reverse transcriptase. First strand cDNA synthesis was performed on single cells, pools of cells and controls in a 20 μl (single cells) or 25 μl (10 cell pools) volume containing a final concentration of 1X Invitrogen Superscript III Buffer, 30 U of RNasin, 15 mM DTT, 10 mM dNTP, 100 ng Random Primers (Promega), 400 ng Anchored Oligo (dT)<sub>20</sub> Primer (Invitrogen), 100 U Superscript III Reverse Transcriptase (Life Tech) and DEPC-treated water according to manufactures protocol and stored at -20°C. Clone Manager software (Sci Ed Software) was used to design primers that cross at least one intron-exon boundary. In order to confirm that STIM1 was knocked out, STIM1 primers were designed to include part of exon 2 (see Table 1). Single cell PCR conditions were optimized for primer concentration, magnesium concentration and annealing temperature. Standard curves were generated using hypothalamic cDNA with dilutions from 1:50 to 1:12,800 for primers used for qPCR to determine the efficiency ( $E = 10^{(-1/m)} - 1$ ; table 1). Primer pairs with efficiencies of 90-100% permit the use of the comparative  $\Delta\Delta CT$  method for analysis (Livak and Schmittgen, 2001; Pfaffl, 2001).

PCR for *Kiss1*, *Stim1*, *Trpc4* and *Trpc5* mRNAs was performed on 3 μl of cDNA from single cells in a 30 μl reaction volume containing 1X GoTaq Flexi buffer (Promega), 2 mM MgCl<sub>2</sub>, 10 mM dNTP, 0.33 μM forward and reverse primers, 2 U GoTaq Flexi Polymerase (Promega) and 0.22 μg TaqStart Antibody (Clontech). 45-50 cycles of amplification were performed on a Bio-Rad C1000 thermocycler and the resulting product visualized with ethidium bromide on a 2% agarose gel.

243 Quantitative PCR (qPCR) was performed on 3-4  $\mu$ l of cDNA from pools of 5-10 cells (3-4 pools/animal) in  
244 duplicate for the target genes (*Stim1*, *Stim2*, *Trpc4* and *Trpc5*) and 2  $\mu$ l in duplicate for the reference gene  
245 (*Gapdh*) in a 20  $\mu$ l reaction volume containing 1X Power SYBR Green PCR Master Mix (Applied Biosystems)  
246 and 0.5  $\mu$ M forward and reverse primers. Forty cycles of amplification were run on a Quant Studio 7 Flex Real-  
247 Time PCR System (Applied Biosystems) and the resulting data was analyzed using the comparative  $\Delta\Delta$ CT  
248 method (Livak and Schmittgen, 2001; Pfaffl, 2001). The relative linear quantity was determined with the  $2^{-\Delta\Delta$ CT  
249 equation (Bosch et al., 2013). The mean of all of the  $\Delta$ CT values ( $\Delta$ CT = CT of the target gene – CT of the  
250 reference gene) from the controls was used as the calibrator and the data is expressed as fold change in gene  
251 expression.

### 252 253 *Drugs*

254 A standard artificial cerebrospinal fluid was used (Qiu et al., 2011). All drugs were purchased from Tocris  
255 Bioscience (Minneapolis, MN) unless otherwise specified. Tetrodotoxin (TTX) was purchased from Alomone  
256 Labs (Jerusalem, Israel) (1 mM) and dissolved in H<sub>2</sub>O. Thapsigargin (Tg, 2 mM), TacR3 agonist senktide (1 mM)  
257 and TRPC4/5 antagonist, HC 070 (from MedChemExpress, 10 mM) were prepared in dimethylsulfoxide (DMSO).  
258 Aliquots of the stock solutions were stored as appropriate until needed.

### 259 260 *Data analysis*

261 For qPCR four Kiss1 neuronal pools (10 cells/pool) from each animal were run in duplicate for the mRNAs  
262 that encode for STIM1, STIM2 and GAPDH and the mean value of each gene from each animal (n = 3 animals)  
263 was used for statistical analysis. Data are expressed as mean  $\pm$  SEM and were analyzed using an unpaired  
264 student's t-test. In addition, Kiss1 neuronal pools (5-10 cells/pool) were used to determine the expression of  
265 *Trpc4* and *Trpc5* in these neurons. For scRT-PCR the number of Kiss1-positive cells harvested from Kiss1<sup>Cre:GFP</sup>  
266 females injected with Cre-dependent ChR2-mCherry or from Kiss1<sup>Cre:GFP::Ai32</sup> females were used to qualitatively  
267 assess the number of Kiss1 neurons with *Stim1*, *Stim2*, *Trpc4*, *Trpc5* and percent expression.

268  
269 Comparisons between different treatments were performed using a repeated measures, two-way or one-way

ANOVA analysis with the *post hoc* Bonferroni's test. Differences were considered statistically significant if  $p < 0.05$ . All data are expressed as mean  $\pm$  SEM.

## Results

### *Validation of conditional deletion of Stim1 in Kiss1 neurons*

STIM1 is involved in the regulation of neuronal firing in cerebellar Purkinje neurons (Hartmann et al., 2014; Ryu et al., 2017), dopaminergic neurons (Sun et al., 2017) and hypothalamic arcuate POMC neurons (Qiu et al., 2018b). Initially to see if STIM1 regulates Kiss1<sup>ARH</sup> neuronal excitability, we measured the mRNA expression of *Stim1* and its close homolog *Stim2* in manually harvested Kiss1<sup>ARH</sup> neurons by quantitative real-time PCR (**Figure 1A**). Based on the qPCR, mRNA levels of *Stim1* were greater than those of *Stim2* in Kiss1<sup>ARH</sup> neurons (**Figure 1A1**). Likewise, in cerebellar Purkinje neurons, *Stim1* is also much more abundant than *Stim2* (Hartmann et al., 2014), while in hippocampal (Berna-Erro et al., 2009) and cortical neurons (Gruszczynska-Biegala et al., 2011) *Stim2* expression levels exceed those of *Stim1*. A qualitative, unbiased sampling of Kiss1<sup>ARH</sup> neurons (n=60) from ovariectomized *Kiss1<sup>Cre</sup>* females (n =3) revealed that *Stim1* mRNA was expressed in  $81.7 \pm 7.6$  percent and *Stim2* mRNA was detected in  $81.2 \pm 2.7$  percent of Kiss1<sup>ARH</sup> neurons with 70 percent of neurons expressing both *Stim1* and *Stim2*.

To elucidate the functional role of STIM1 in Kiss1 neurons, we generated mice that lack STIM1 selectively in Kiss1 neurons (*Stim1<sup>kkO</sup>*, detailed in Methods). We confirmed the *Stim1* deletion in *Stim1<sup>kkO</sup>* mice using single cell quantitative PCR of pools of harvested Kiss1<sup>ARH</sup> neurons (n= 3 animals) (**Figure 1A2**). Consistent with the scRT-PCR results (**Figure 1B**), *Stim1* mRNA was undetectable in *Stim1<sup>kkO</sup>* neurons (**Figure 1A2**), whereas there was no reduction in *Stim2* mRNA expression (**Figure 1A3**). In contrast, *Stim1* mRNA was still expressed in the majority of adjacent nonfluorescent neurons obtained from both *Stim1<sup>kkO</sup>* and *Kiss1<sup>Cre</sup>* mice.

### *Stim1 deletion reduces Store Operated Calcium Entry (SOCE)*

SOCE constitutes an important source of calcium entry and signaling in neurons. Depletion of ER Ca<sup>2+</sup> stores causes the ER Ca<sup>2+</sup> sensor STIM proteins (STIM1 and STIM2) to interact with and activate cell surface Ca<sup>2+</sup> release-activated Ca<sup>2+</sup> (CRAC) channels, thereby resulting in a second wave of cytoplasmic Ca<sup>2+</sup> rise (Moccia et al., 2015). Genetic suppression of *Stim1* in neural progenitor cells results in abrogation of this second wave of calcium rise that constitutes SOCE (Somasundaram et al., 2014). We asked whether deletion of *Stim1* in Kiss1<sup>ARH</sup> neurons (*Stim1*<sup>kk<sup>o</sup></sup>) attenuates neuronal SOCE. Kiss1<sup>Cre</sup> and *Stim1*<sup>kk<sup>o</sup></sup> mice received bilateral ARH injections of GCaMP6 viral vector (**Figure 1C1, C2**), and the Kiss1<sup>ARH</sup> or *Stim1*<sup>kk<sup>o</sup></sup> neurons with GCaMP6s in slices were imaged using spinning disk confocal microscopy (**Figure 2-video supplement 1**). ER Ca<sup>2+</sup> stores were released by treatment with 2 μM thapsigargin (Tg), a blocker of the SERCA (sarcoplasmic/endoplasmic reticulum Ca<sup>2+</sup> ATPase) pump. As expected, Tg treatment of neurons bathed in Ca<sup>2+</sup>-free aCSF generated an initial wave of cytoplasmic Ca<sup>2+</sup> release ([Ca<sup>2+</sup>]<sub>i</sub>) as measured by an increase in GCaMP6s activity both in control and *Stim1*-deleted neurons (**Figure 1D, E and F**). As long as neurons were kept in Ca<sup>2+</sup>- free aCSF, the ER stores remained empty, a situation that was presumably sensed by the Ca<sup>2+</sup> sensor STIMs. Upon switching to a normal aCSF containing 2 mM Ca<sup>2+</sup>, an immediate SOCE response was observed as a second wave of cytoplasmic Ca<sup>2+</sup> rise. Consistent with a role for STIM1 regulation, we observed an attenuation of SOCE in *Stim1*<sup>kk<sup>o</sup></sup> neurons (**Figure 1D, E, F and G**:  $\Delta F/F_0 \cdot 100 = 1274.5 \pm 49.4$ , n = 4, Kiss1<sup>ARH</sup> group versus  $389.0 \pm 86.1$ , n = 4, *Stim1*<sup>kk<sup>o</sup></sup> group, which was measured from the 15 minute time point to the peak, unpaired t-test,  $t_{(6)} = 8.921$ ,  $p = 0.0001$ ,  $***p < 0.005$ ), indicating that STIM1 plays a major role in SOCE after Tg-induced ER Ca<sup>2+</sup> depletion in Kiss1<sup>ARH</sup> neurons as has been shown in other CNS neurons (Guner et al., 2017; Pavez et al., 2019).

#### *TacR3 -induced increase in [Ca<sup>2+</sup>]<sub>i</sub> is augmented by deletion of Stim1*

TacR3 classically couples to a Gq protein-calcium signaling and excites Kiss1<sup>ARH</sup> neurons (de Croft et al., 2013; Ruka et al., 2013; Qiu et al., 2016). Calcium is of critical importance to neurons as it participates in the transmission of depolarizing signals and contributes to synaptic activity (Brini et al., 2014). Therefore, we tested whether STIM1 can modulate TacR3-mediated calcium responses. We first measured the effects of the TacR3, which is Gq-coupled, agonist senktide on GCaMP6s-expressing Kiss1<sup>ARH</sup> neurons in arcuate slices from *Kiss1*<sup>Cre</sup> mice; senktide (1 μM) rapidly induced an increase in [Ca<sup>2+</sup>]<sub>i</sub> (**Figures 2A,C**). Next, we investigated if STIM1

324 contributes to intracellular rise in  $[Ca^{2+}]_i$  after senktide activation. Indeed, deletion of *Stim1* significantly  
325 augmented the peak TacR3-mediated response by ~three-fold ( $\Delta F/F_0 \cdot 100 = 244.0 \pm 27.7$ ,  $n = 7$  slices, *Kiss1*<sup>ARH</sup>  
326 group versus  $622.1 \pm 133.2$ ,  $n = 6$  slices), *Stim1*<sup>kk<sup>o</sup></sup> group; two-way ANOVA: main effect of treatment ( $F_{(1,11)} =$   
327  $5.265$ ,  $p = 0.0424$ ), main effect of time ( $F_{(19,209)} = 42.69$ ,  $p < 0.0001$ ) and interaction ( $F_{(19,209)} = 6.486$ ,  $p < 0.0001$ );  
328 *post hoc* Bonferroni test, \*\*\*\* $p < 0.001$ ; \*\* $p < 0.01$ ; \* $p < 0.05$ ). (**Figures 2B, C**). Likewise, the area under the  
329 curve was significantly increased in the *Stim1*<sup>kk<sup>o</sup></sup> group by four-fold (*Kiss1*<sup>cre</sup>:  $954.8 \pm 200.4$ ,  $n = 7$  versus *Kiss1*<sup>kk<sup>o</sup></sup>:  
330  $3746.0 \pm 1227.0$ ,  $n = 6$ ) (**Figure 2D**).

### 331 *Deletion of STIM1 enhances slow EPSP in Kiss1<sup>ARH</sup> neurons*

332 *Kiss1*<sup>ARH</sup> neurons are the chief component of the GnRH pulse generator circuit (Navarro et al., 2009; Lehman  
333 et al., 2010; Navarro et al., 2011; Okamura et al., 2013), such that they synchronize their activity to trigger the  
334 release of peptides to drive pulsatile release of GnRH (Qiu et al., 2016; Clarkson et al., 2017). To investigate if  
335 STIM1 modulates the activity of *Kiss1*<sup>ARH</sup> neurons, we bilaterally injected AAV1-Ef1a-DIO-ChR2:mCherry into  
336 the arcuate nucleus of *Kiss1*<sup>Cre</sup> and *Stim1*<sup>kk<sup>o</sup></sup> mice. To verify that *Trpc5* mRNAs is co-localized in these *Kiss1*<sup>ARH</sup>  
337 neurons, we harvested 50 *Kiss1*<sup>ARH</sup> neurons from 2 females and did scRT-PCR for *Trpc5* and *Trpc4* expression.  
338 The single-cell analysis revealed that *Trpc5* transcript was detectable in 82% of *Kiss1*<sup>ARH</sup> neurons, but *Trpc4*  
339 mRNA was not detected in *Kiss1*<sup>ARH</sup> neurons (**Figure 3A**). Moreover, quantitative single cell PCR documented  
340 that *Trpc5* but not *Trpc4* mRNA was expressed in *Kiss1*<sup>ARH</sup> neurons (**Figure 3B**). With whole-cell recording we  
341 verified the expression of TRPC5 channels by documenting the senktide - induced typical double-rectifying I/V  
342 plot characteristic of the activation of TRPC5 channels (**Figure 3C**) as we previously reported (Kelly et al., 2018).  
343 Initially, whole-cell patch recording in *Kiss1*<sup>ARH</sup> neurons from ovariectomized *Kiss1* or *Stim1*<sup>kk<sup>o</sup></sup> female mice  
344 revealed that there was no difference in the resting membrane potential (RMP: *Kiss1*:  $-66.0 \pm 1.7$  mV,  $n = 38$   
345 versus *Stim1*<sup>kk<sup>o</sup></sup>:  $-68.2 \pm 0.9$  mV,  $n = 58$ ) or membrane capacitance ( $C_m$ : *Kiss1*:  $25.0 \pm 1.0$  pF,  $n = 38$  versus  
346 *Stim1*<sup>kk<sup>o</sup></sup>:  $27.3 \pm 0.9$  pF,  $n = 58$ ). However, there was a significant difference in the membrane input resistance  
347 ( $R_{in}$ : *Kiss1*:  $524.2 \pm 42.4$   $\Omega$ ,  $n = 38$ , versus *Stim1*<sup>kk<sup>o</sup></sup>:  $417.3 \pm 26.9$   $\Omega$ ,  $n = 58$ , unpaired two-tailed *t* test,  $t_{(94)} =$   
348  $2.242$ ,  $p = 0.0273$ ), which has also been reported with *Stim1* knockout in cerebellar Purkinje neurons (Ryu et  
349 al., 2017). *Kiss1*<sup>ARH</sup> neurons expressing ChR2-mCherry in slices were photostimulated at 20 Hz for 10 s (**Figure**

350 **3-video supplement 1**) to generate slow EPSPs as previously described (Qiu et al., 2016). As we had  
351 hypothesized, deletion of *Stim1* augmented the slow EPSP induced by high-frequency optogenetic stimulation  
352 (**Figure 3D-F**). Also in the presence of TTX to block voltage-gated Na<sup>+</sup> channels, we observed that senktide  
353 induced larger inward currents in Kiss1<sup>ARH</sup> neurons from *Stim1*<sup>kkO</sup> mice versus *Kiss1*<sup>Cre</sup> mice (**Figure 4A-C**).  
354 Although the senktide-induced cation current was significantly increased by *Stim1* deletion, the I/V plots revealed  
355 that the reversal potential for the current was not different between Kiss1<sup>ARH</sup> neurons recorded from *Stim1*<sup>kkO</sup>  
356 mice or *Kiss1*<sup>Cre</sup> mice (*Kiss1*: -10.5 ± 2.1 mV, n = 4, vs *Stim1*<sup>kkO</sup>: -9.8 ± 2.2 mV, n = 4, unpaired two-tailed *t* test,  
357 *t*<sub>(6)</sub> = 0.2503, *p* = 0.8107) (**Figure 4D-F**). These results indicate that STIM1 expression governs the activity of  
358 TRPC5 channels, which contribute to the synchronous activity of Kiss1<sup>ARH</sup> neurons.

### 359 *NKB agonist activates TRPC5 channels in Kiss1<sup>ARH</sup> neurons from Kiss1<sup>Cre</sup> and Stim1<sup>kkO</sup> mice*

360 Based on our previous findings that TRPC5 channel protein is expressed in Kiss1<sup>ARH</sup> neurons and is activated  
361 by the NKB agonist senktide (Qiu et al., 2011; Kelly et al., 2018), we investigated the contribution of TRPC5  
362 channels to generating the slow EPSP. We used a ratio method in which a slow EPSP was generated by  
363 optogenetic stimulation (20 Hz, 10 s) of Kiss1<sup>Cre</sup>:ChR2 neurons and then stimulated again 10 min later after drug  
364 exposure (Qiu et al., 2016). For the Kiss1<sup>ARH</sup> neurons from ovariectomized female *Kiss1:Ai32* mice, the RMP,  
365 C<sub>m</sub> and R<sub>in</sub> were -72.7 ± 0.8 mV, 22.4 ± 0.7 pF and 458.6 ± 23.3 Ω, n = 50, respectively. Using this protocol, we  
366 found that the slow EPSP was inhibited by perfusing the TRPC4/5 channel blocker HC 070 (100 nM) (Just et al.,  
367 2018) for 5 minutes, and the ratio was significantly decreased from 60 to 30 percent (**Figure 5A-C**). Since *Trpc4*  
368 mRNA is not expressed in Kiss1<sup>ARH</sup> neurons (**Figure 3A, B**), we would argue that TRPC5 channels mediate the  
369 slow EPSP in these neurons. To elucidate the TRPC5 channel contribution to the postsynaptic activity of  
370 Kiss1<sup>ARH</sup> neurons from *Stim1*<sup>kkO</sup> mice, we perfused TTX to block fast sodium channels and found that HC 070  
371 significantly suppressed the senktide-induced inward current (**Figure 5D, E and F**).

### 372 *Stim1* deletion in Kiss1<sup>ARH</sup> neurons has minimal effects on estrous cycle

373  
374 *Stim1*<sup>kkO</sup> mice on the C57BL/6 background were viable at the expected Mendelian ratio and did not show  
375 any difference in the time to vaginal opening (*Stim1*<sup>kkO</sup> mice: postnatal day 30.2 ± 0.8, n = 21 versus *Kiss1*<sup>Cre</sup>  
376

377 mice: postnatal day  $29.1 \pm 0.8$ ,  $n = 19$ , Unpaired  $t$  test,  $t_{(38)} = 1.003$ ,  $p = 0.3222$ ). However, since kisspeptin  
378 neurons are responsible for the maintenance of the reproductive cycle (Seminara et al., 2003; d'Anglemont de  
379 Tassigny et al., 2007; Mayer et al., 2010), and *Stim1* deletion facilitated the synchronous firing of Kiss1<sup>ARH</sup>  
380 neurons, we measured the effects of *Stim1* deletion in Kiss1 neurons on the estrous cycle. We monitored the  
381 estrous cycle of *Stim1*<sup>kk0</sup> and *Kiss1*<sup>Cre</sup> female mice with vaginal lavage for two weeks before ovariectomy for the  
382 metabolic studies (see below). *Stim1*<sup>kk0</sup> female mice exhibited prolonged estrous cycles versus the *Kiss1*<sup>Cre</sup>  
383 females (**Figure 6A,B,C versus 6D,E,F**) with a slight prolongation of estrous days (**Figure 6H**). Although more  
384 in depth analysis is warranted (*i.e.*, measurement of pulsatile LH), the results were not unexpected since  
385 augmented synchronous activity of Kiss1<sup>ARH</sup> neurons, as we documented at the cellular level, should still drive  
386 luteinizing hormone (LH) pulses in these female mice (Qiu et al., 2016; Clarkson et al., 2017).

### 388 *Stim1* deletion in Kiss1<sup>ARH</sup> neurons protects ovariectomized females against diet-induced obesity

389 Subsequently, the same two cohorts of female mice, *Stim1*<sup>kk0</sup> ( $n=10$ ) and the littermate control *Kiss1*<sup>Cre</sup>  
390 ( $n=10$ ) mice, were ovariectomized at around 3 months of age and put on a high fat diet for eight weeks (see  
391 Methods). Over this time period, there was significantly less gain in body weight in the *Stim1*<sup>kk0</sup> versus the  
392 *Kiss1*<sup>Cre</sup> mice (**Figure 7A, B**). Moreover, the average fat mass of *Stim1*<sup>kk0</sup> mice was significantly lighter than that  
393 of *Kiss1*<sup>Cre</sup> controls by week 6 (*Stim1*<sup>kk0</sup> versus *Kiss1*<sup>Cre</sup> mice fat mass:  $7.6 \pm 0.9$  g,  $n=10$  versus  $11.4 \pm 1.1$  g,  
394  $n=10$ ) (**Figure 7C**). The lean mass of *Stim1*<sup>kk0</sup> mice was also significantly less versus the *Kiss1*<sup>Cre</sup> mice (*Stim1*<sup>kk0</sup>  
395 versus the *Kiss1*<sup>Cre</sup> mice lean mass:  $16.9 \pm 0.4$  g,  $n=10$  versus  $18.9 \pm 0.4$  g,  $n=10$ ) (**Figure 7D**). After 6 weeks,  
396 both *Stim1*<sup>kk0</sup> and *Kiss1*<sup>Cre</sup> controls were assessed for glucose tolerance using an *i.p.* glucose tolerance test (see  
397 Methods). Both *Stim1*<sup>kk0</sup> and *Kiss1*<sup>Cre</sup> females started at relatively the same blood glucose levels after an  
398 overnight fast (**Figure 7E, time 0**), suggesting similar whole-body homeostatic conditions after fasting. However,  
399 *Stim1*<sup>kk0</sup> female mice had significantly lower glucose levels after *i.p.* glucose compared to *Kiss1*<sup>Cre</sup> females,  
400 indicating that *Stim1*<sup>kk0</sup> females were more glucose tolerant compared to *Kiss1*<sup>Cre</sup> controls. *Stim1*<sup>kk0</sup> females had  
401 a significantly higher glucose clearance rate than controls based on the integrated area under the curve (*Stim1*<sup>kk0</sup>  
402 versus the *Kiss1*<sup>Cre</sup> controls AUC:  $20,232 \pm 868$  mg/dL  $\times$  min,  $n = 6$  versus  $22,622 \pm 624$  mg/dL  $\times$  min,  $n = 6$ ).  
403 Finally, when both groups were euthanized after eight weeks on HFD and the tissues harvested, both the



404 intrascapular brown adipose tissue (iBAT) and perigonadal adipose tissue (GAT) were dissected from each  
405 mouse and weighed. Both iBAT and GAT masses were significantly lighter in the *Stim1<sup>kkO</sup>* versus the *Kiss1<sup>Cre</sup>*  
406 females (*Stim1<sup>kkO</sup>* versus the *Kiss1<sup>Cre</sup>* iBAT:  $73.3 \pm 6.0$  mg, n=10 versus  $97.3 \pm 9.6$  mg, n=10; *Stim1<sup>kkO</sup>* versus  
407 the *Kiss1<sup>Cre</sup>* GAT:  $1.5 \pm 0.2$  g, n=10 versus  $2.3 \pm 0.2$  g, n=10) (**Figures 7F, G**). Overall, these results suggest  
408 that conditional deletion of *Stim1* in *Kiss1<sup>ARH</sup>* neurons affords some protection against diet-induced obesity.  
409 However, we cannot overlook the possibility that deletion of *Stim1* in *Kiss1*-expressing hepatocytes might  
410 contribute to this metabolic phenotype (Song et al., 2014).

## 412 Discussion

413 For the first time, we show that conditional knockout of *Stim1* significantly reduces store-operated  $\text{Ca}^{2+}$  entry  
414 (SOCE) in *Kiss1<sup>ARH</sup>* neurons following thapsigargin-mediated depletion of  $\text{Ca}^{2+}$  stores. Based on single cell  
415 qPCR analysis, *Stim1* mRNA was expressed at approximately two-fold higher levels than *Stim2* in *Kiss1<sup>ARH</sup>*  
416 neurons, and deletion of *Stim1* did not alter expression of *Stim2* in *Kiss1<sup>ARH</sup>* neurons—*i.e.*, there was no  
417 developmental compensation. Selective deletion of *Stim1* in *Kiss1<sup>ARH</sup>* neurons augmented the TacR3-mediated  
418 increase in  $[\text{Ca}^{2+}]_i$  and synchronous activity of *Kiss1<sup>ARH</sup>* neurons by almost 4-fold. Whole-cell recording revealed  
419 that the slow EPSP induced by high-frequency optogenetic stimulation of *Kiss1<sup>ARH</sup>:ChR2* neurons was  
420 significantly enhanced by *Stim1* deletion. This augmentation of the slow EPSP was mediated by TacR3 coupling  
421 to TRPC 5 channel activation since the senktide-induced inward current was equally enhanced. Moreover, the  
422 inward current exhibited the signature double rectifying I/V plot of TRPC 5 channels and was antagonized by the  
423 TRPC 4/5 channel blocker HC070. The enhanced TacR3 signaling in *Stim1<sup>kkO</sup>* female mice afforded some  
424 protection against diet-induced obesity and glucose intolerance.

425  
426 Mammalian TRPC channels can be activated by G protein-coupled receptors and receptor tyrosine kinases  
427 (Clapham, 2003; Ambudkar and Ong, 2007) and are one of the major targets for group I metabotropic glutamate  
428 receptor (mGluR1) signaling in CNS neurons (Tozzi et al., 2003; Bengtson et al., 2004; Faber et al., 2006; Berg  
429 et al., 2007). In substantia nigra dopamine neurons TRPC 5 channels are highly expressed, and mGluR1  
430 agonists induce a current that exhibits a double-rectifying current-voltage plot (Tozzi et al., 2003) similar to the

431 effects of the NKB agonist senktide in Kiss1<sup>ARH</sup> neurons (**Figure 3**). Both mGluR1 and TacR3 are Gq-coupled  
432 to phospholipase C (PLC) activation which leads to hydrolysis of phosphatidylinositol 4,5-bisphosphate (PIP<sub>2</sub>) to  
433 diacylglycerol (DAG) and inositol 1,4,5 triphosphate (IP<sub>3</sub>). TRPC channels are minimally Ca<sup>2+</sup> selective, but can  
434 associate with Orai calcium channels to form calcium release-activated calcium channels (Birnbaumer, 2009).  
435 A unique feature of TRPC 5 (and TRPC 4) channels is that they are potentiated by lanthanum (La<sup>3+</sup>) (Clapham  
436 et al., 2005), which we have exploited to characterize TRPC 5 signaling in POMC neurons (Qiu et al., 2010; Qiu  
437 et al., 2014).

438  
439 Both leptin and insulin excite/depolarize Kiss1<sup>ARH</sup> and proopiomelanocortin (POMC) neurons through  
440 activation of TRPC 5 channels (Qiu et al., 2010; Qiu et al., 2011; Qiu et al., 2014; Kelly et al., 2018). More  
441 recently, we documented a critical role of STIM1 in the insulin signaling cascade in POMC neurons (Qiu et al.,  
442 2018b). *Stim1* mRNA is highly expressed in POMC (Qiu et al., 2018b) and Kiss1<sup>ARH</sup> neurons (**Figure 1**), and E2  
443 downregulates *Stim1* mRNA expression in microdissected arcuate nuclei that encompasses these two  
444 populations of neurons. Downregulation of *Stim1* is critical for maintaining insulin excitability in POMC neurons  
445 with diet-induced obesity (Qiu et al., 2018b). In ovariectomized females that are relatively refractory to insulin  
446 excitation, pharmacological blockade of the SOCE complex quickly increases the insulin-mediated excitation of  
447 POMC neurons (*i.e.*, activation of the TRPC 5 mediated inward current), which supports the concept that TRPC  
448 5 channels play a role both in SOCE and receptor operated calcium entry (Birnbaumer, 2009; Salido et al., 2011).  
449 Therefore, selective deletion of *Stim1* in Kiss1 neurons should ensure that TRPC 5 channels function as receptor-  
450 operated channels to couple TacR3's and transmit the excitatory effects of NKB to induce synchronous firing of  
451 Kiss1<sup>ARH</sup> neurons as demonstrated in the present findings.

452  
453 Downregulating STIM1 inhibits SOCE, attenuates Ca<sup>2+</sup> influx into the ER and elevates intracellular Ca<sup>2+</sup>  
454 levels, which could also contribute to activation of TRPC5 channels in Kiss1<sup>ARH</sup> neurons (Blair et al., 2009).  
455 Indeed, we have found that Ca<sup>2+</sup> greatly potentiates the leptin-induced TRPC 5 current in POMC neurons (Qiu  
456 et al., 2010). In cortical neurons and heterologous cells expressing *Cav1.2* (L-type calcium) channels and *Stim1*,  
457 inhibition of STIM1 augments Ca<sup>2+</sup> influx through L-type calcium channels (Park et al., 2010; Wang et al., 2010).

458 Calcium sensing by STIM1 is also involved in the control of L-type  $\text{Ca}^{2+}$  channel activity in the hippocampal  
459 pyramidal neurons such that glutamate-mediated depolarization activates L-type calcium channels, and releases  
460  $\text{Ca}^{2+}$  from ER stores that activates STIM1 and drives aggregation of the L-type calcium channels to inhibit their  
461 activity (Dittmer et al., 2017). Quite possibly in Kiss1<sup>ARH</sup> neurons and Purkinje cells (Ryu et al., 2017) deletion  
462 of *Stim1* allows the “dis-aggregation” of TRPC 5 channels, which is reflected in the significant decrease in  $R_{in}$  in  
463 both cell types with deletion. Furthermore, knocking down STIM1 in cardiomyocyte-derived (HL-1) cells  
464 increases the peak amplitude and current density of T-type calcium channels and shifts the activation curve  
465 toward more negative membrane potentials (Nguyen et al., 2013). Biotinylation assays reveal that knocking  
466 down *Stim1* increases T-type calcium channel surface expression, and co-immunoprecipitation assays suggest  
467 that STIM1 directly regulates T-type channel activity (Nguyen et al., 2013). Thus, STIM1 appears to be a negative  
468 regulator of voltage-gated calcium channel activity. On the other hand, estradiol treatment in ovariectomized  
469 females upregulates *Cav3.1* channel expression by 3-fold and whole cell currents by 10-fold in Kiss1<sup>ARH</sup> neurons,  
470 which greatly enhances the excitability and contributes to the synchronous firing of Kiss1<sup>ARH</sup> neurons (Qiu et al.,  
471 2018a). The T-type calcium channel *Cav3.1* underlies burst firing in rostral hypothalamic kisspeptin neurons  
472 (Zhang et al., 2013b) and facilitates TRPC 4 channel activation in GnRH neurons (Zhang et al., 2008; Zhang et  
473 al., 2013a). *Cav3.1* channels may also facilitate TRPC5 channel opening in Kiss1<sup>ARH</sup> neurons (**Figure 8**), but  
474 this remains to be determined.

475  
476 Presumably with conditional knockout, *Stim1* was deleted in all cells expressing kisspeptin, which includes  
477 arcuate, anteroventral periventricular preoptic (AVPV) and amygdala kisspeptin neurons, and non-neural  
478 kisspeptin cells in the gonads, pancreas and liver (Dudek et al., 2019). Currently, we found that the deletion of  
479 *Stim1* in kisspeptin neurons had a minor effect on the estrous cycle. *Stim1*<sup>kk<sup>o</sup></sup> mice exhibited more estrous-type  
480 vaginal cytology, which may be indicative of higher levels of circulating estrogens due to increased synchronous  
481 firing of kisspeptin neurons and excitatory drive to GnRH neurons (Qiu et al., 2016; Clarkson et al., 2017). It is  
482 important to note that synchronous firing of “pulse generator” Kiss1<sup>ARH</sup> neurons is a failsafe system for  
483 maintaining gonadotropin pulses and folliculogenesis in female rodents (Nagae et al., 2021).

485 Because of the well-documented anorexigenic actions of E2 on POMC and Agouti-related peptide  
486 (AgRP) neurons controlling energy homeostasis (Qiu et al., 2006; Roepke et al., 2010; Clegg, 2012; Kelly and  
487 Rønnekleiv, 2012; Smith et al., 2013), we ovariectomized the females before feeding them a high fat diet. After  
488 7 weeks on a high fat diet, *Stim1<sup>kkO</sup>* females gained modestly less body weight but showed significantly less body  
489 fat and lean mass than ovariectomized *Kiss1<sup>Cre</sup>* females on a high fat diet. Most importantly, *Stim1<sup>kkO</sup>* females  
490 exhibited improved glucose tolerance. *Kiss1<sup>ARH</sup>* neurons probably mediate these protective effects via their input  
491 onto POMC and AgRP neurons. Besides the peptides *Kiss1<sup>ARH</sup>* neurons also co-express the vesicular glutamate  
492 transporter 2 (vGluT2) (Cravo et al., 2011), and we have documented that optogenetic stimulation of *Kiss1<sup>ARH</sup>*  
493 neurons expressing channelrhodopsin releases glutamate, which is dependent on the estrogenic state of  
494 females (Qiu et al., 2018a). Although the mRNA expression of *Kiss1*, *Tac2* and *Pdyn* mRNA in *Kiss1<sup>ARH</sup>* neurons  
495 are all down-regulated by E2 (Navarro et al., 2009; Lehman et al., 2010), *Vglut2* mRNA expression is upregulated  
496 together with increased probability of glutamate release in E2 treated, ovariectomized females (Qiu et al.,  
497 2018a). Low frequency (1-2 Hz) optogenetic stimulation of *Kiss1<sup>ARH</sup>* neurons evokes fast ionotropic  
498 glutamatergic EPSCs in POMC and AgRP neurons, but high frequency (20 Hz) optogenetic stimulation releases  
499 enough glutamate to induce a slow excitatory response in POMC neurons but a slow inhibitory response in AgRP  
500 neurons (Nestor et al., 2016; Qiu et al., 2016; Qiu et al., 2018a). Indeed, the group I mGluR agonist DHPG  
501 depolarizes POMC neurons, while group II/III mGluR agonists (DCG-IV; AMN082) hyperpolarize AgRP neurons  
502 (Qiu et al., 2018a). Group I mGluRs (mGluR1 and mGluR5) are G<sub>q</sub>/G<sub>11</sub>-coupled, while group II/III mGluRs  
503 (mGluR2 and mGluR7) are G<sub>i</sub>/G<sub>o</sub>-coupled (Niswender and Conn, 2010). Hence, the output of *Kiss1<sup>ARH</sup>* neurons  
504 excites the anorexigenic POMC neurons and inhibits the orexigenic AgRP neurons. Therefore, *Kiss1<sup>ARH</sup>* neurons  
505 appear to be an integral part of an anorexigenic circuit in the hypothalamus (Qiu et al., 2018a; Rønnekleiv et al.,  
506 2019; Navarro, 2020).

507  
508 Presently, there is compelling evidence that *Kiss1<sup>ARH</sup>* neurons are a critical “command” neuron for  
509 coordinating energy states with reproductive functions (see (Rønnekleiv et al., 2019; Navarro, 2020) for review).  
510 We have now documented that conditional knockout of *Stim1* in *Kiss1<sup>ARH</sup>* neurons, which augments the NKB-  
511 mediated depolarization of these neurons via TRPC 5 channels, helps protect ovariectomized, female mice from

diet-induced obesity and glucose intolerance. In addition, in preliminary experiments we have found that insulin treatment *in vitro* increases the synchronous firing (GCaMP6 activity) of Kiss1<sup>ARH</sup> neurons, which further emphasizes its role as a “command” neuron. Clearly, Kiss1<sup>ARH</sup> neurons are part of a hypothalamic circuit for coordinating reproduction with energy balance, but additional experiments are needed to elucidate the cellular mechanisms by which steroid and metabolic hormonal signaling synergize to govern their activity.

## References

- Ambudkar IS, Ong HL (2007) Organization and function of TRPC channelsomes. *Pflügers Archiv: European Journal of Physiology* 455:187-200.
- Asarian L, Geary N (2006) Modulation of appetite by gonadal steroid hormones. *Philosophical Transactions of the Royal Society B: Biological Sciences* 361:1251-1263.
- Ayala JE, Samuel VT, Morton GJ, Obici S, Croniger CM, Shulman GI, Wasserman DH, McGuinness OP, Consortium NIHMMPC (2010) Standard operating procedures for describing and performing metabolic tests of glucose homeostasis in mice. *Disease Models & Mechanisms* 3:525-534.
- Bengtson CP, Tozzi A, Bernardi G, Mercuri NB (2004) Transient receptor potential-like channels mediate metabotropic glutamate receptor EPSCs in rat dopamine neurones. *The Journal of Physiology* 555:323-330.
- Berg AP, Sen N, Bayliss DA (2007) TrpC3/C7 and Slo2.1 are molecular targets for metabotropic glutamate receptor signaling in rat striatal cholinergic interneurons. *The Journal of Neuroscience* 27:8845-8856.
- Berna-Erro A, Braun A, Kraft R, Kleinschnitz C, Schuhmann MK, Stegner D, Wultsch T, Eilers J, Meuth SG, Stoll G, Nieswandt B (2009) STIM2 Regulates Capacitive Ca<sup>2+</sup> Entry in Neurons and Plays a Key Role in Hypoxic Neuronal Cell Death. *Science Signaling* 2:ra67-ra67.
- Birnbaumer L (2009) The TRPC class of ion channels: a critical review of their roles in slow, sustained increases in intracellular Ca<sup>2+</sup> concentrations. *Annual Review of Pharmacology and Toxicology* 49:395-426.
- Blair NT, Kaczmarek JS, Clapham DE (2009) Intracellular calcium strongly potentiates agonist-activated

- 539 TRPC5 channels. *The Journal of General Physiology* 133:525-546.
- 540 Bosch MA, Tonsfeldt KJ, Rønnekleiv OK (2013) mRNA expression of ion channels in GnRH neurons: subtype-  
541 specific regulation by 17 $\beta$ -Estradiol. *Molecular and Cellular Endocrinology* 367:85-97.
- 542 Brini M, Cali T, Ottolini D, Carafoli E (2014) Neuronal calcium signaling: function and dysfunction. *Cellular and*  
543 *Molecular Life Sciences* 71:2787-2814.
- 544 Castellano JM, Tena-Sempere M (2013) Metabolic regulation of kisspeptin. *Advances in Experimental*  
545 *Medicine and Biology* 784:363-383.
- 546 Castellano JM, Navarro VM, Fernández-Fernández R, Nogueiras R, Tovar S, Roa J, Vazquez MJ, Vigo E,  
547 Casanueva FF, Aguilar E, Pinilla L, Dieguez C, Tena-Sempere M (2005) Changes in hypothalamic  
548 KiSS-1 system and restoration of pubertal activation of the reproductive axis by kisspeptin in  
549 undernutrition. *Endocrinology* 146:3917-3925.
- 550 Clapham DE (2003) TRP channels as cellular sensors. *Nature* 426:517-524.
- 551 Clapham DE, Julius D, Montell C, Schultz G (2005) International Union of Pharmacology. XLIX. Nomenclature  
552 and structure-function relationships of transient receptor potential channels. *Pharmacological Reviews*  
553 *57:427-450*.
- 554 Clarkson J, Han SY, Piet R, McLennan T, Kane GM, Ng J, Porteous RW, Kim JS, Colledge WH, Iremonger KJ,  
555 Herbison AE (2017) Definition of the hypothalamic GnRH pulse generator in mice. *Proceedings of the*  
556 *National Academy of Sciences of the United States of America* 114:E10216-E10223.
- 557 Clegg DJ (2012) Minireview: the year in review of estrogen regulation of metabolism. *Molecular Endocrinology*  
558 *26:1957-1960*.
- 559 Cravo RM, Margatho LO, Osborne-Lawrence S, Donato JJ, Atkin S, Bookout AL, Rovinsky S, Frazão R, Lee  
560 CE, Gautron L, Zigman JM, Elias CF (2011) Characterization of *Kiss1* neurons using transgenic mouse  
561 models. *Neuroscience* 173:37-56.
- 562 Czaja JA (1978) Ovarian influences on primate food intake: assessment of progesterone actions. *Physiology &*  
563 *Behavior* 21:923-928.
- 564 d'Anglemont de Tassigny X, Fagg LA, Dixon JPC, Day K, Leitch HG, Hendrick AG, Zahn D, Franceschini I,  
565 Caraty A, Carlton MBL, Aparicio SAJR, Colledge WH (2007) Hypogonadotropic hypogonadism in mice

- 566 lacking a functional *KiSS 1* gene. Proceedings of the National Academy of Sciences of the United  
567 States of America 104:10714-10719.
- 568 De Bond JA, Smith JT (2014) Kisspeptin and energy balance in reproduction. *Reproduction* 147:R53-63.
- 569 de Croft S, Boehm U, Herbison AE (2013) Neurokinin B activates arcuate kisspeptin neurons through multiple  
570 tachykinin receptors in the male mouse. *Endocrinology* 154:2750-2760.
- 571 De Roux N, Genin E, Carel J-C, Matsuda F, Chaussain J-L, Milgrom E (2003) Hypogonadotropic  
572 hypogonadism due to loss of function of the *KiSS 1*-derived peptide receptor GPR54. Proceedings of  
573 the National Academy of Sciences of the United States of America 100:10972-10976.
- 574 Dittmer PJ, Wild AR, Dell'Acqua ML, Sather WA (2017) STIM1 Ca<sup>2+</sup> Sensor Control of L-type Ca<sup>2+</sup>-Channel-  
575 Dependent Dendritic Spine Structural Plasticity and Nuclear Signaling. *Cell Reports* 19:321-334.
- 576 Dudek M, Ziarniak K, Cateau M-L, Dufourny L, Sliwowska JH (2019) Diabetes type 2 and kisspeptin: Central  
577 and peripheral sex-specific actions. *Trends in Endocrinology & Metabolism* 30:833-843.
- 578 Faber ES, Sedlak P, Vidovic M, Sah P (2006) Synaptic activation of transient receptor potential channels by  
579 metabotropic glutamate receptors in the lateral amygdala. *Neuroscience* 137:781-794.
- 580 Fernández-Fernández R, Martini AC, Navarro VM, Castellano JM, Dieguez C, Aguilar E, Pinilla L, Tena-  
581 Sempere M (2006) Novel signals for the integration of energy balance and reproduction. *Molecular and*  
582 *Cellular Endocrinology* 254-255:127-132.
- 583 Fu LY, van den Pol AN (2010) Kisspeptin directly excites anorexigenic proopiomelanocortin neurons but  
584 inhibits orexigenic neuropeptide Y cells by an indirect synaptic mechanism. *The Journal of*  
585 *Neuroscience* 30:10205-10219.
- 586 Gao Y, Yao T, Deng Z, Sohn J-W, Sun J, Huang Y, Kong X, Yu K-J, Wang R-T, Chen H, Guo H, Yan J,  
587 Cunningham KA, Chang Y, Liu T, Williams KW (2017) TrpC5 mediates acute leptin and serotonin  
588 effects via *Pomc* neurons. *Cell Reports* 18:583-592.
- 589 Goodman RL, Lehman MN, Smith JT, Coolen LM, de Oliveira CVR, Jafarzadehshirazi MR, Pereira A, Iqbal J,  
590 Caraty A, Ciofi P, Clarke IJ (2007) Kisspeptin neurons in the arcuate nucleus of the ewe express both  
591 dynorphin A and neurokinin B. *Endocrinology* 148:5752-5760.
- 592 Gruszczynska-Biegala J, Pomorski P, Wisniewska MB, Kuznicki J (2011) Differential Roles for STIM1 and

- 593 STIM2 in Store-Operated Calcium Entry in Rat Neurons. PLOS ONE 6:e19285.
- 594 Guner G, Guzelsoy G, Isleyen FS, Sahin GS, Akkaya C, Bayam E, Kotan EI, Kabakcioglu A, Ince-Dunn G  
595 (2017) NEUROD2 Regulates *Stim1* Expression and Store-Operated Calcium Entry in Cortical Neurons.  
596 *eneuro* 4:ENEURO.0255-0216.2017.
- 597 Han S-K, Gottsch ML, Lee KJ, Popa SM, Smith JT, Jakawich SK, Clifton DK, Steiner RA, Herbison AE (2005)  
598 Activation of gonadotropin-releasing hormone neurons by kisspeptin as a neuroendocrine switch for the  
599 onset of puberty. *The Journal of Neuroscience* 25:11349-11356.
- 600 Hartmann J, Karl RM, Alexander RP, Adelsberger H, Brill MS, Rühlmann C, Ansel A, Sakimura K, Baba Y,  
601 Kurosaki T, Misgeld T, Konnerth A (2014) STIM1 controls neuronal Ca<sup>2+</sup> signaling, mGluR1-dependent  
602 synaptic transmission, and cerebellar motor behavior. *Neuron* 82:635-644.
- 603 Just S et al. (2018) Treatment with HC-070, a potent inhibitor of TRPC4 and TRPC5, leads to anxiolytic and  
604 antidepressant effects in mice. *PLOS One* 13:e0191225.
- 605 Kelly MJ, Rønnekleiv OK (2012) Membrane-initiated actions of estradiol that regulate reproduction, energy  
606 balance and body temperature. *Frontiers in Neuroendocrinology* 33:376-387.
- 607 Kelly MJ, Qiu J, Rønnekleiv OK (2018) TRPCing around the hypothalamus. *Frontiers in Neuroendocrinology*  
608 51:116-124.
- 609 Kuohung W, Kaiser UB (2006) GPR54 and KiSS-1: role in the regulation of puberty and reproduction. *Reviews*  
610 *in Endocrine and Metabolic Disorders* 7:257-263.
- 611 Lehman MN, Coolen LM, Goodman RL (2010) Minireview: kisspeptin/neurokinin B/dynorphin (KNDy) cells of  
612 the arcuate nucleus: a central node in the control of gonadotropin-releasing hormone secretion.  
613 *Endocrinology* 151:3479-3489.
- 614 Livak KJ, Schmittgen TD (2001) Analysis of relative gene expression data using real-time quantitative PCR  
615 and the 2<sup>-ΔΔCT</sup> method. *Methods* 25:402-408.
- 616 Madisen L et al. (2012) A toolbox of Cre-dependent optogenetic transgenic mice for light-induced activation  
617 and silencing. *Nature Neuroscience* 15:793-802.
- 618 Mayer C, Acosta-Martinez M, Dubois SL, Wolfe A, Radovick S, Boehm U, Levine JE (2010) Timing and  
619 completion of puberty in female mice depend on estrogen receptor α-signaling in kisspeptin neurons.



- 620 Proceedings of the National Academy of Sciences 107:22693-22698.
- 621 Moccia F, Zuccolo E, Soda T, Tanzi F, Guerra G, Mapelli L, Lodola F, D'Angelo E (2015) Stim and Orai  
622 proteins in neuronal Ca<sup>2+</sup> signaling and excitability. *Frontiers in Cellular Neuroscience* 9:153.
- 623 Nagae M, Uenoyama Y, Okamoto S, Tsuchida H, Ikegami K, Goto T, Majarune S, Nakamura S, Sanbo M,  
624 Hirabayashi M, Kobayashi K, Inoue N, Tsukamura H (2021) Direct evidence that KNDy neurons  
625 maintain gonadotropin pulses and folliculogenesis as the GnRH pulse generator. *Proceedings of the*  
626 *National Academy of Sciences* 118:e2009156118.
- 627 Navarro VM (2020) Metabolic regulation of kisspeptin — the link between energy balance and reproduction.  
628 *Nature Reviews Endocrinology* 16:407-420.
- 629 Navarro VM, Gottsch ML, Chavkin C, Okamura H, Clifton DK, Steiner RA (2009) Regulation of gonadotropin-  
630 releasing hormone secretion by kisspeptin/dynorphin/neurokinin B neurons in the arcuate nucleus of  
631 the mouse. *The Journal of Neuroscience* 29:11859-11866.
- 632 Navarro VM, Castellano JM, McConkey SM, Pineda R, Ruiz-Pino F, Pinilla L, Clifton DK, Tena-Sempere M,  
633 Steiner RA (2011) Interactions between kisspeptin and neurokinin B in the control of GnRH secretion in  
634 the female rat. *American Journal of Physiology: Endocrinology and Metabolism* 300:E202-E210.
- 635 Nestor CC, Kelly MJ, Rønnekleiv OK (2014) Cross-talk between reproduction and energy homeostasis: central  
636 impact of estrogens, leptin and kisspeptin signaling. *Hormone Molecular Biology and Clinical*  
637 *Investigation* 17:109-128.
- 638 Nestor CC, Qiu J, Padilla SL, Zhang C, Bosch MA, Fan W, Aicher SA, Palmiter RD, Rønnekleiv OK, Kelly MJ  
639 (2016) Optogenetic stimulation of arcuate nucleus Kiss1 neurons reveals a steroid-dependent  
640 glutamatergic input to POMC and AgRP neurons in male mice. *Molecular Endocrinology* 30:630-644.
- 641 Nguyen N, Biet M, Simard É, Bèliveau É, Francoeur N, Guillemette G, Dumaine R, Grandbois M, Boulay G  
642 (2013) STIM1 participates in the contractile rhythmicity of HL-1 cells by moderating T-type Ca<sup>2+</sup> channel  
643 activity. *Biochimica et Biophysica Acta* 1833:1294-1303.
- 644 Niswender CM, Conn PJ (2010) Metabotropic glutamate receptors: physiology, pharmacology, and disease.  
645 *Annual Review of Pharmacology and Toxicology* 50:295-322.
- 646 Oh-hora M, Yamashita M, Hogan PG, Sharma S, Lamperti E, Chung W, Prakriya M, Feske S, Rao A (2008)

- 647 Dual functions for the endoplasmic reticulum calcium sensors STIM1 and STIM2 in T cell activation and  
648 tolerance. *Nature Immunology* 9:432-443.
- 649 Okamura H, Tsukamura H, Ohkura S, Uenoyama Y, Wakabayashi Y, Maeda K (2013) Kisspeptin and GnRH  
650 pulse generation. *Advances in Experimental Medicine and Biology* 784:297-323.
- 651 Padilla SL, Johnson CW, Barker FD, Patterson MA, Palmiter RD (2018) A neural circuit underlying the  
652 generation of hot flushes. *Cell Reports* 24:271-277.
- 653 Park CY, Shcheglovitov A, Dolmetsch R (2010) The CRAC channel activator STIM1 binds and inhibits L-type  
654 voltage-gated calcium channels. *Science* 330:101-105.
- 655 Pavez M, Thompson AC, Arnott HJ, Mitchell CB, D'Atri I, Don EK, Chilton JK, Scott EK, Lin JY, Young KM,  
656 Gasperini RJ, Foa L (2019) STIM1 Is Required for Remodeling of the Endoplasmic Reticulum and  
657 Microtubule Cytoskeleton in Steering Growth Cones. *The Journal of Neuroscience* 39:5095-5114.
- 658 Pfaffl MW (2001) A new mathematical model for relative quantification in real-time RT-PCR. *Nucleic Acids*  
659 *Research* 29:e45.
- 660 Pielecka-Fortuna J, Chu Z, Moenter SM (2008) Kisspeptin acts directly and indirectly to increase gonadotropin-  
661 releasing hormone neuron activity and its effects are modulated by estradiol. *Endocrinology* 149:1979-  
662 1986.
- 663 Qiu J, Fang Y, Rønnekleiv OK, Kelly MJ (2010) Leptin excites proopiomelanocortin neurons via activation of  
664 TRPC channels. *The Journal of Neuroscience* 30:1560-1565.
- 665 Qiu J, Fang Y, Bosch MA, Rønnekleiv OK, Kelly MJ (2011) Guinea pig kisspeptin neurons are depolarized by  
666 leptin via activation of TRPC channels. *Endocrinology* 152:1503-1514.
- 667 Qiu J, Bosch MA, Tobias SC, Grandy DK, Scanlan TS, Rønnekleiv OK, Kelly MJ (2003) Rapid signaling of  
668 estrogen in hypothalamic neurons involves a novel G-protein-coupled estrogen receptor that activates  
669 protein kinase C. *The Journal of Neuroscience* 23:9529-9540.
- 670 Qiu J, Nestor CC, Zhang C, Padilla SL, Palmiter RD, Kelly MJ, Rønnekleiv OK (2016) High-frequency  
671 stimulation-induced peptide release synchronizes arcuate kisspeptin neurons and excited GnRH  
672 neurons. *eLife* 5:e16246.
- 673 Qiu J, Rivera HM, Bosch MA, Padilla SL, Stincic TL, Palmiter RD, Kelly MJ, Rønnekleiv OK (2018a)

- 674 Estrogenic-dependent glutamatergic neurotransmission from kisspeptin neurons governs feeding  
675 circuits in females. *eLife* 7:e35656.
- 676 Qiu J, Bosch MA, Meza C, Navarro UV, Nestor CC, Wagner EJ, Rønnekleiv OK, Kelly MJ (2018b) Estradiol  
677 protects proopiomelanocortin neurons against insulin resistance. *Endocrinology* 159:647-664.
- 678 Qiu J, Zhang C, Borgquist A, Nestor CC, Smith AW, Bosch MA, Ku S, Wagner EJ, Rønnekleiv OK, Kelly MJ  
679 (2014) Insulin excites anorexigenic proopiomelanocortin neurons via activation of canonical transient  
680 receptor potential channels. *Cell Metabolism* 19:682-693.
- 681 Qiu J, Bosch MA, Tobias SC, Krust A, Graham S, Murphy S, Korach KS, Chambon P, Scanlan TS, Rønnekleiv  
682 OK, Kelly MJ (2006) A G-protein-coupled estrogen receptor is involved in hypothalamic control of  
683 energy homeostasis. *The Journal of Neuroscience* 26:5649-5655.
- 684 Roepke TA, Bosch MA, Rick EA, Lee B, Wagner EJ, Seidlova-Wuttke D, Wuttke W, Scanlan TS, Rønnekleiv  
685 OK, Kelly MJ (2010) Contribution of a membrane estrogen receptor to the estrogenic regulation of body  
686 temperature and energy homeostasis. *Endocrinology* 151:4926-4937.
- 687 Rønnekleiv OK, Qiu J, Kelly MJ (2019) Arcuate Kisspeptin Neurons Coordinate Reproductive Activities with  
688 Metabolism. *Seminars in Reproductive Medicine* 37:131-140.
- 689 Ruka KA, Burger LL, Moenter SM (2013) Regulation of arcuate neurons coexpressing kisspeptin, neurokinin B,  
690 and dynorphin by modulators of neurokinin 3 and  $\kappa$ -opioid receptors in adult male mice. *Endocrinology*  
691 154:2761-2771.
- 692 Ryu C, Jang DC, Jung D, Kim YG, Shim HG, Ryu H-H, Lee Y-S, Linden DJ, Worley PF, Kim SJ (2017) STIM1  
693 regulates somatic  $Ca^{2+}$  signals and intrinsic firing properties of cerebellar Purkinje neurons. *The Journal*  
694 *of Neuroscience* 37:8876.
- 695 Salido GM, Jardin I, Rosado JA (2011) The TRPC ion channels: association with Orai1 and STIM1 proteins  
696 and participation in capacitative and non-capacitative calcium entry. *Advances in Experimental*  
697 *Medicine and Biology* 704:413-433.
- 698 Seminara SB, Messenger S, Chatzidaki EE, Thresher RR, Acierno JS, Shagoury JK, Bo-Abbas Y, Kuohung W,  
699 Schwinof KM, Hendrick AG, Zahn D, Dixon J, Kaiser UB, Slaugenhaupt SA, Gusella JF, O'Rahilly S,  
700 Carlton MBL, Crowley WF, Aparicio SAJR, Colledge WH (2003) The GPR54 gene as a regulator of

- 701 puberty. *The New England Journal of Medicine* 349:1614-1627.
- 702 Smith AW, Bosch MA, Wagner EJ, Rønnekleiv OK, Kelly MJ (2013) The membrane estrogen receptor ligand  
703 STX rapidly enhances GABAergic signaling in NPY/AgRP neurons: Role in mediating the anorexigenic  
704 effects of 17 $\beta$ -estradiol. *American Journal of Physiology: Endocrinology and Metabolism* 305:E632-  
705 E640.
- 706 Somasundaram A, Shum AK, McBride HJ, Kessler JA, Feske S, Miller RJ, Prakriya M (2014) Store-Operated  
707 CRAC Channels Regulate Gene Expression and Proliferation in Neural Progenitor Cells. *The Journal of*  
708 *Neuroscience* 34:9107-9123.
- 709 Song WJ, Mondal P, Wolfe A, Alonso LC, Stamateris R, Ong BW, Lim OC, Yang KS, Radovick S, Novaira HJ,  
710 Farber EA, Farber CR, Turner SD, Hussain MA (2014) Glucagon regulates hepatic kisspeptin to impair  
711 insulin secretion. *Cell Metabolism* 19:667-681.
- 712 Stengel A, Wang L, Goebel-Stengel M, Tache Y (2011) Centrally injected kisspeptin reduces food intake by  
713 increasing meal intervals in mice. *Neuroreport* 22:253-257.
- 714 Sun Y, Zhang H, Selvaraj S, Sukumaran P, Lei S, Birnbaumer L, Singh BB (2017) Inhibition of L-Type Ca<sup>2+</sup>  
715 channels by TRPC1-STIM1 complex is essential for the protection of dopaminergic neurons. *The*  
716 *Journal of Neuroscience* 37:3364-3377.
- 717 Tolson KP, Marooki N, Wolfe A, Smith JT, Kauffman AS (2019) Cre/lox generation of a novel whole-body  
718 Kiss1r KO mouse line recapitulates a hypogonadal, obese, and metabolically-impaired phenotype.  
719 *Molecular and Cellular Endocrinology* 498:110559.
- 720 Tolson KP, Garcia C, Yen S, Simonds S, Stefanidis A, Lawrence A, Smith JT, Kauffman AS (2014) Impaired  
721 kisspeptin signaling decreases metabolism and promotes glucose intolerance and obesity. *Journal of*  
722 *Clinical Investigation* 124:3075-3079.
- 723 Topaloglu AK, Tello JA, Kotan LD, Ozbek MN, Yilmaz MB, Erdogan S, Gurbuz F, Temiz F, Millar RP, Yuksel B  
724 (2012) Inactivating KISS1 mutation and hypogonadotropic hypogonadism. *The New England Journal of*  
725 *Medicine* 366:629-635.
- 726 Tozzi A, Bengtson CP, Longone P, Carignani C, Fusco FR, Bernardi G, Mercuri NB (2003) Involvement of  
727 transient receptor potential-like channels in responses to mGluR-I activation in midbrain dopamine

- 728 neurons. *European Journal of Neuroscience* 18:2133-2145.
- 729 Wang Y, Deng X, Mancarella S, Hendron E, Eguchi S, Soboloff J, Tang XD, Gill DL (2010) The calcium store  
730 sensor, STIM1, reciprocally controls Orai and Cav1.2 channels. *Science* 330:105-109.
- 731 Yuan JP, Zeng W, Huang GN, Worley PF, Muallem S (2007) STIM1 heteromultimerizes TRPC channels to  
732 determine their function as store-operated channels. *Nature Cell Biology* 9:636-645.
- 733 Zhang C, Roepke TA, Kelly MJ, Rønnekleiv OK (2008) Kisspeptin depolarizes gonadotropin-releasing  
734 hormone neurons through activation of TRPC-like cationic channels. *The Journal of Neuroscience*  
735 28:4423-4434.
- 736 Zhang C, Bosch MA, Rønnekleiv OK, Kelly MJ (2013a) Kisspeptin activation of TRPC4 channels in female  
737 GnRH neurons requires PIP<sub>2</sub> depletion and cSrc kinase activation. *Endocrinology* 154:2772-2783.
- 738 Zhang C, Tonsfeldt KJ, Qiu J, Bosch MA, Kobayashi K, Steiner RA, Kelly MJ, Rønnekleiv OK (2013b)  
739 Molecular mechanisms that drive estradiol-dependent burst firing of Kiss1 neurons in the rostral  
740 periventricular preoptic area. *American Journal of Physiology: Endocrinology and Metabolism*  
741 305:E1384-E1397.
- 742
- 743

## Figure Legends

FIGURE 1

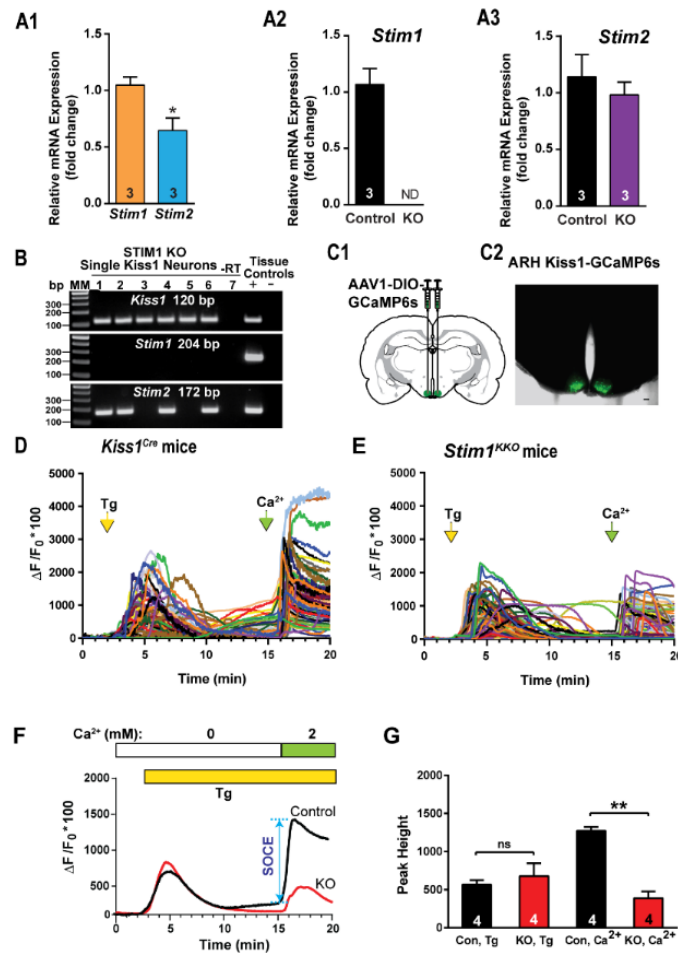

**Figure 1. Expression Patterns of *Stim1* and *Stim2* in the arcuate Kiss1 neurons.** **A1-A3**, quantitative PCR assay measuring *Stim1* and *Stim2* in Kiss1<sup>ARH</sup> neuronal pools (n = 3 animals, 10 cells in each pool, 4 pools/animal) from *Kiss1*<sup>Cre</sup> control and *Stim1*<sup>kko</sup> female mice (n=3 animals per group). **A1**, comparison between *Stim1* and *Stim2* in controls only. Bar graphs represent mean  $\pm$  SEM (Unpaired *t*-test,  $t_{(4)} = 3.079$ , \*  $p = 0.0370$ ); **A2**, *Stim1* was non-detectable (ND) in the STIM1<sup>KKO</sup> neuronal pools (Unpaired *t*-test,  $t_{(4)} = 7.559$ , \*\*  $p = 0.0016$ ); **A3**, the *Stim2* expression level of Kiss1<sup>ARH</sup> neurons was not different between *Kiss1*<sup>Cre</sup> control and *Stim1*<sup>kko</sup> female mice (Unpaired *t*-test,  $t_{(4)} = 0.7143$ ,  $p = 0.5145$ ). **B**, representative gels illustrating mRNA expression of *Stim1* and *Stim2* in single Kiss1<sup>ARH</sup> neurons from *Stim1*<sup>kko</sup> mice. The expected base pair (bp) sizes are *Kiss1*, 120 bp; *Stim1*, 204 bp; *Stim2*, 172 bp. A single neuron was processed without reverse transcriptase (-RT) and RNA extracted

771 from hypothalamic tissue was used as positive (+, with RT) and negative (-, without RT) tissue controls. MM,  
772 molecular marker. **C**, left, schematic of a coronal section showing the bilateral viral injections in the ARH with  
773 AAV-DIO-GCaMP6s. Right, photomicrograph showing a coronal section confirming targeted bilateral injections  
774 of DIO-GCaMP6s into the ARH. **D** and **E**, representative traces of GCaMP6s activity based on cytosolic  $\text{Ca}^{2+}$   
775 measurements in Kiss1<sup>ARH</sup> neurons from *Kiss1<sup>Cre</sup>:GCaMP6s* mice (**D**) and *Stim1<sup>kkO</sup>:GCaMP6s* mice (**E**). ER  $\text{Ca}^{2+}$   
776 stores were depleted with 2  $\mu\text{M}$  thapsarginin, a SERCA inhibitor, after 20 min of perfusion with aCSF containing  
777 0 mM  $\text{Ca}^{2+}$ . SOCE was evaluated by substituting the extracellular aCSF containing 0 mM  $\text{Ca}^{2+}$  with aCSF  
778 containing 2 mM  $\text{Ca}^{2+}$ . **F**, averaged traces from **D** and **E** revealed that deletion of *Stim1* in Kiss1<sup>ARH</sup> neurons  
779 attenuated the store-operated  $\text{Ca}^{2+}$  entry (SOCE). **G**, bar graphs summarizing the effects of depletion of  $\text{Ca}^{2+}$   
780 store by Tg and  $\text{Ca}^{2+}$  influx (SOCE) in Kiss1<sup>ARH</sup> neurons from *Kiss1<sup>Cre</sup>:GCaMP6s* and *Stim1<sup>kkO</sup>:GCaMP6s* mice  
781 (two-way ANOVA: main effect of treatment ( $F_{(1,3)} = 13.84$ ,  $p = 0.0338$ ), main effect of time ( $F_{(1,3)} = 5.199$ ,  $p =$   
782 0.1069) and interaction ( $F_{(1,3)} = 52.14$ ,  $p = 0.0055$ );  $n =$  number of slices; *post hoc* Bonferroni test, \*\* $p < 0.01$ , for  
783 SOCE; ns = no significant, for depletion of  $\text{Ca}^{2+}$  store.

784  
785 **FIGURE 2**

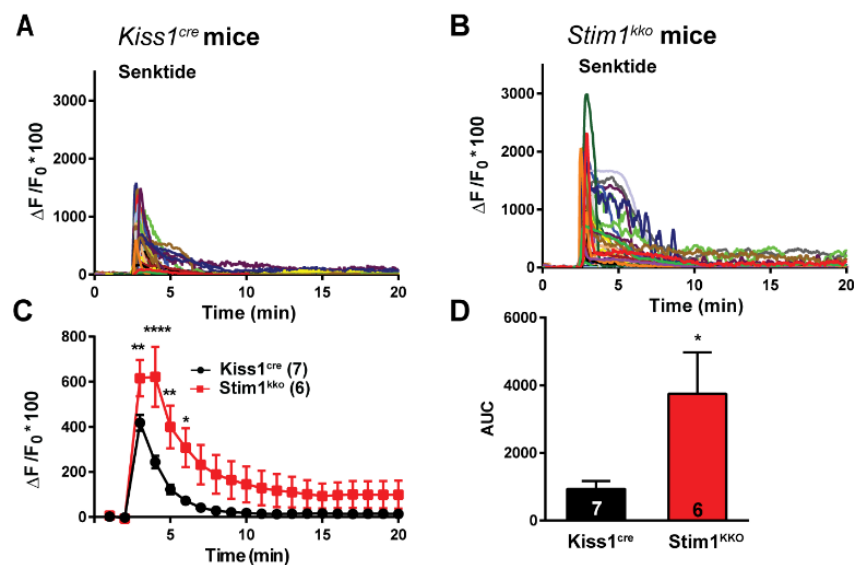

796 **Figure 2. Senktide-induced increase in  $[\text{Ca}^{2+}]_i$  is augmented by deletion of *Stim1* in GCaMP6s-expressing**  
797 **Kiss1<sup>ARH</sup> neurons from *Kiss1<sup>Cre</sup> and *Stim1<sup>kkO</sup> mice.**** **A** and **B**, representative traces of senktide-induced  $[\text{Ca}^{2+}]_i$

in  $Kiss1^{ARH}$  neurons from  $Kiss1^{Cre}$  (A) and  $Stim1^{kko}$  (B) mice. Traces represent individual cells within a single slice. **C**, summary of the potentiation of senktide-induced  $[Ca^{2+}]_i$  by deletion of  $Stim1$ . Two-way ANOVA: main effect of treatment ( $F_{(1,11)} = 5.265$ ,  $p = 0.0424$ ), main effect of time ( $F_{(19,209)} = 42.69$ ,  $p < 0.0001$ ) and interaction ( $F_{(19,209)} = 6.486$ ,  $p < 0.0001$ );  $n$  = number of slices; *post hoc* Bonferroni test, \*\*\*\* $p < 0.001$ ; \*\* $p < 0.01$ ; \* $p < 0.05$ . **D**, AUC of  $Kiss1^{ARH}$  neurons from  $Kiss1^{Cre}$  and  $Stim1^{kko}$  mice from C. There was a significant difference (Unpaired *t*-test,  $t_{(11)} = 2.430$ , \* $p = 0.0334$ ) between the two groups.

**FIGURE 3**

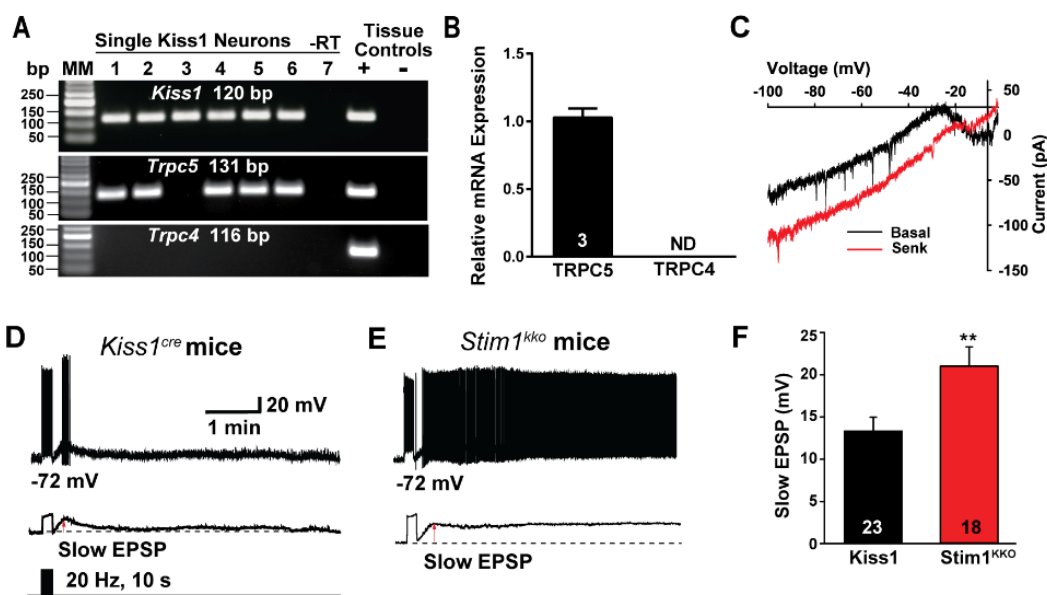

**Figure 3. Deletion of  $Stim1$  augments high-frequency optogenetic stimulation-induced slow EPSP depolarization in  $Kiss1^{ARH}$  neurons.** **A**, representative gel image illustrating the mRNA expression of *Trpc5* channel subunit in  $Kiss1^{ARH}$  neurons harvested from female mice. The expected size of PCR products for *Kiss1* and *Trpc5* are indicated. *Trpc4* mRNA was not detected in  $Kiss1^{ARH}$  neurons. MM is the molecular marker; -RT indicates a harvested  $Kiss1$  neuron reacted without RT; + indicates positive tissue control (with RT); - indicates negative tissue control (without RT) using cDNA from mouse medial basal hypothalamic tissue; RT, reverse transcriptase. **B**, quantitative single cell PCR (3 x 10 cell pools per animal,  $n = 3$  animals) verified that *Trpc5* was expressed in  $Kiss1^{ARH}$  neurons, whereas *Trpc4* mRNA was not detected (Unpaired *t*-test for the left,  $t_{(4)} = 15.67$ ,



\*\*\*\*  $p < 0.0001$ ). **C**, the I-V relationship for the Senk-induced inward current recorded in Kiss1<sup>ARH</sup> neurons from Kiss1<sup>Cre</sup> mice using a Cs<sup>+</sup> internal solution (n= 4) revealed a reversal of -10 mV and rectification. **D, E**, high-frequency optogenetic stimulation (20 Hz, 10 s) generated slow EPSPs in a ChR2-expressing Kiss1<sup>ARH</sup> neuron from control Kiss1 mice (**D**) and in a ChR2-expressing Kiss1<sup>ARH</sup> neuron from Stim1<sup>kkO</sup> mice (**E**). The lower trace shows the slow EPSP after low-pass filtering from D and E (arrow), respectively. **F**, summary of the effects of Stim1 deletion on the slow EPSP amplitude. Bar graphs represent the mean  $\pm$  SEM (Unpaired *t*-test,  $t_{(39)} = 2.802$ , \*\* $p = 0.0079$ ).

#### FIGURE 4

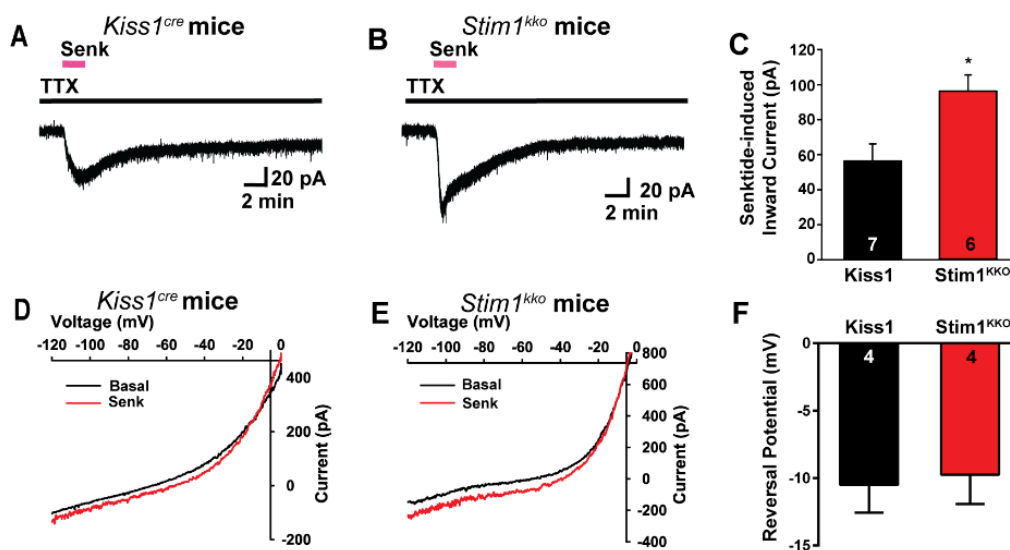

**Figure 4. Deletion of Stim1 augments senktide-induced depolarization in Kiss1<sup>ARH</sup> neurons.** **A and B**, rapid bath application of senktide (1  $\mu$ M) induced an inward current in the presence of fast sodium channel blockade (TTX, 1 $\mu$ M) in Kiss1<sup>ARH</sup> neurons from *Kiss1<sup>Cre</sup>* and *Stim1<sup>kkO</sup>* mice.  $V_{\text{hold}} = -60$  mV. **C**, summary of the effects of senktide in Kiss1<sup>ARH</sup> neurons from *Kiss1<sup>Cre</sup>* and *Stim1<sup>kkO</sup>* mice (Unpaired *t*-test,  $t_{(11)} = 2.929$ , \* $p = 0.0137$ ). Data points represent the mean  $\pm$  SEM. Cell numbers are indicated. **D and E**, the I-V relationship before and during the peak response of senktide (Senk) in Kiss1<sup>ARH</sup> neurons from *Kiss1<sup>Cre</sup>* (**D**) and *Stim1<sup>kkO</sup>* (**E**) mice indicated that the reversal potential of the nonselective cation current was  $\sim -10$  mV. **F**, summary of the reversal potentials of the senktide-induced cation current recorded in Kiss1<sup>ARH</sup> neurons from *Kiss1<sup>Cre</sup>* and *Stim1<sup>kkO</sup>* mice. Bar graphs represent the mean  $\pm$  SEM (unpaired two-tailed *t* test,  $t_{(6)} = 0.2503$ ,  $p = 0.8107$ ).

352  
353  
354  
355  
356  
357  
358  
359  
360  
361  
362  
363  
364  
365  
366  
367  
368  
369  
370  
371  
372  
373  
374  
375  
376  
377  
378

FIGURE 5

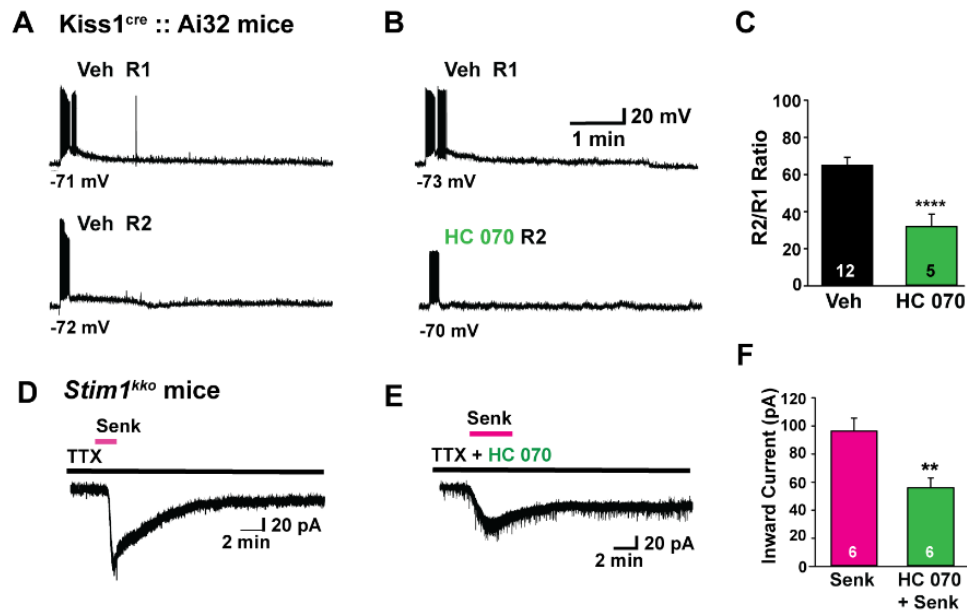

**Figure 5. *Stim1* deletion augments senktide-induced *Kiss1<sup>ARH</sup>* neuronal excitability through TRPC channel activation.** **A-C**, high frequency photo-stimulation – induced slow EPSP in *Kiss1<sup>ARH</sup>* neurons from *Kiss1<sup>Cre</sup>::Ai32* mice is antagonized by TRPC5 channel blocker. **A–B**, representative traces of high-frequency optogenetic stimulation-induced slow EPSPs in the absence (A) or presence (B) of TRPC4/5 channel blocker HC 070 (100 nM). **C**, summary of the effects of HC 070 on the slow EPSP (Un-paired t-test,  $t_{(15)} = 4.122$ , \*\*\*\* $p = 0.0009$ ). **D–F**, *Stim1* deletion augments senktide-induced inward current, which is antagonized by the TRPC5 channel blocker. **D–E**, representative traces of senktide (1 μM)-induced inward current in *Stim1<sup>tko</sup>* neurons perfused with TTX (1 μM) in the absence (D) or presence (E) of TRPC4/5 blocker HC 070 (100 nM). **F**, summary of the effects of HC 070 on the senktide-induced inward current (Un-paired t-test,  $t_{(10)} = 3.457$ , \*\* $p = 0.0062$ ). Data points represent the mean ± SEM. Cell numbers are indicated.

379

**FIGURE 6**

380

381

382

383

384

385

386

387

388

389

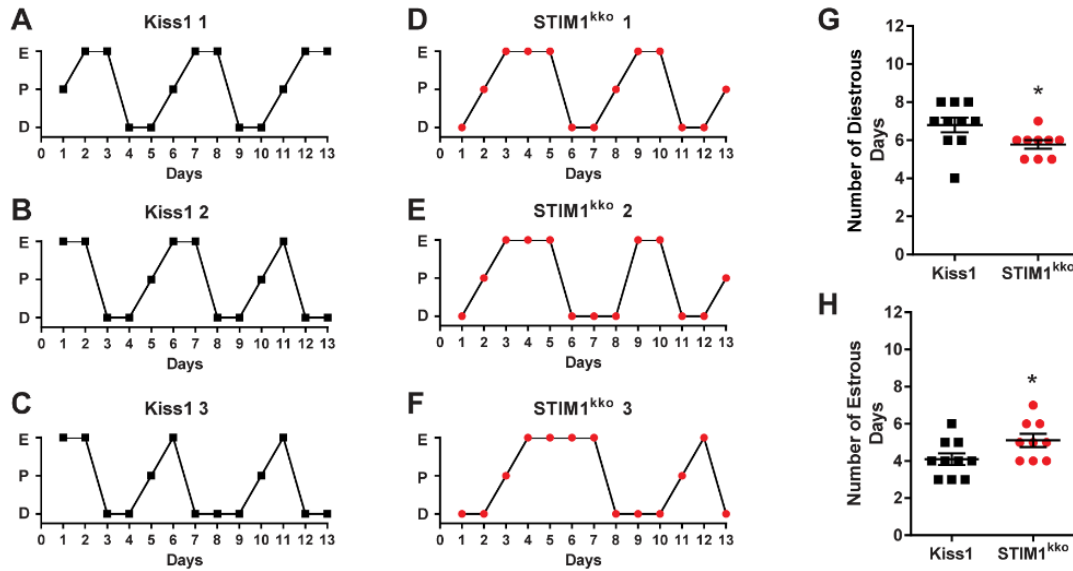

390

**Figure 6. *Stim1<sup>kk0</sup>* mice exhibit more estrous days.** A-F, representative estrous cycle data from three

391

representative control *Kiss1<sup>Cre</sup>* and three *Stim1<sup>kk0</sup>* mice over a thirteen-day period. Vaginal lavage was done

392

daily at 0930 h, and cell cytology was observed and recorded as Diestrus (D), Proestrus (P) or Estrus (E).

393

Summary data for the number of Diestrous days (G) and Estrous days (H) during the 13 day period was

394

compared between *Kiss1<sup>Cre</sup>* (n = 10) and *Stim1<sup>kk0</sup>* mice (n = 9) (unpaired, two-tailed t test for G,  $t_{(17)} = 2.215$ , \*p

395

= 0.0407; unpaired two-tailed t-test for H,  $t_{(17)} = 2.151$ , \*p = 0.0461).

396

## FIGURE 7

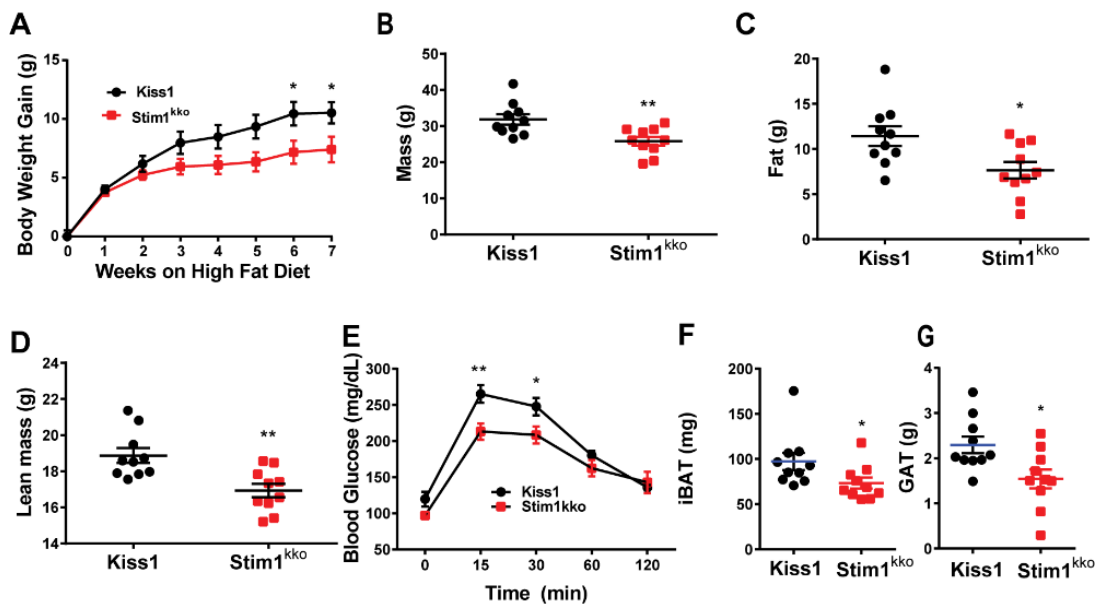

**Figure 7. Ablation of Stim1 in Kiss1 neurons attenuates body mass, fat, and lean in mice on a high fat diet.** *Stim1<sup>kko</sup>* and *Kiss1<sup>Cre</sup>* littermate control females were ovariectomized and fed a high fat diet (HFD; 45% kcal from fat) for seven weeks. **A**, body-weight gain measured once a week for seven weeks. The high fat diet caused significant weight gain in both groups relative to their baseline with the *Kiss1<sup>Cre</sup>* females gaining significantly more weight by 6 weeks [two-way ANOVA: main effect of treatment ( $F_{(1, 18)} = 3.839$ ,  $p = 0.0657$ ), main effect of time ( $F_{(7, 126)} = 98.07$ ,  $p < 0.0001$ ) and interaction ( $F_{(7, 126)} = 4.645$ ,  $p = 0.0001$ ); *Kiss1* control,  $n = 10$ , *Stim1<sup>kko</sup>*,  $n = 10$ ; *post hoc* Bonferroni test,  $*p < 0.05$ ]. **B-D**, mass (B), total body fat (C) and lean mass (D) measured by an EchoMRI Whole Body Composition Analyzer. Lean mass did not include bone and fluids within organs. The difference in mass (B), body fat (C) and lean mass (D) between the groups was significantly different by 6 weeks on high fat diet (unpaired, two-tailed t-test for B,  $t_{(18)} = 3.222$ ,  $**p = 0.0047$ ; unpaired two-tailed t test for C,  $t_{(18)} = 2.662$ ,  $*p = 0.0159$ ; unpaired, two-tailed t test for D,  $t_{(18)} = 3.489$ ,  $*p = 0.0026$ ). **E**, six weeks after high fat diet, there was a significant difference in GTTs between the two groups (two-way ANOVA: main effect of treatment ( $F_{(1, 9)} = 6.282$ ,  $p = 0.0335$ ), main effect of time ( $F_{(4, 36)} = 88.01$ ,  $p < 0.0001$ ) and interaction ( $F_{(4, 36)} = 3.527$ ,  $p = 0.0158$ ); *Kiss1<sup>Cre</sup>*,  $n = 6$ , *Stim1<sup>kko</sup>*,  $n = 5$ ; *post hoc* Bonferroni test,  $**p < 0.01$ ,  $*p < 0.05$ ). **F** and **G**, both interscapular brown adipose tissue (iBAT) and perigonadal adipose tissue (GAT) mass of *Stim1<sup>kko</sup>* were lighter

than that of *Kiss1<sup>Cre</sup>* mice on a fat diet after eight weeks (unpaired, two-tailed t test for iBAT,  $t_{(18)} = 2.127$ ,  $*p = 0.0475$ ; unpaired two-tailed t-test for GAT,  $t_{(18)} = 2.711$ ,  $*p = 0.0143$ ).

**FIGURE 8**

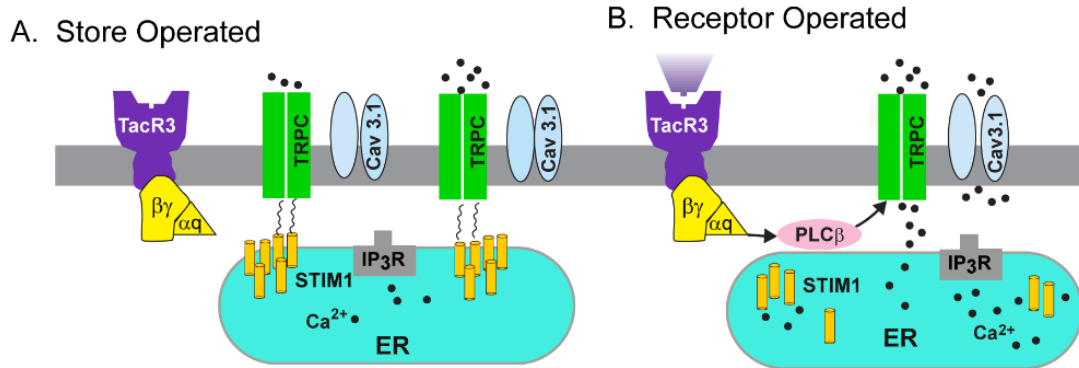

**Figure 8. A cellular model of STIM1 affecting NKB activation of TRPC5 channels in *Kiss1<sup>ARH</sup>* neurons. A,** Store-operated calcium entry (SOCE) is a conserved mechanism by which the depletion of the endoplasmic reticulum (ER) is conveyed to calcium-permeable channels at the plasma membrane (PM), triggering calcium influx from the extracellular space and into the cell cytosol. A physiological mechanism responsible for the activation of SOCE results from the stimulation of G-protein coupled receptors associated with the inositol-triphosphate (IP3) and phospholipase C cascade, resulting in the release of calcium from ER, via the IP3 receptor (IP3R). Under physiological stress and in the absence of E<sub>2</sub>, stromal interaction molecule 1 (STIM1) interacts with TRPC5 channels thereby engaging these Ca<sup>2+</sup> channels as store-operated channels, which are activated with endoplasmic reticulum (ER) depletion of Ca<sup>2+</sup>. **B,** however, under physiological conditions in reproductively active females, in which E<sub>2</sub> down-regulates the expression of *STIM1*, TRPC 5 channels are converted to receptor-operated channels in *Kiss1<sup>ARH</sup>* neurons. Neurokinin B (NKB) binds to its receptor (TacR3) to activate Gαq – PLCβ signaling cascade to facilitate TRPC 5 channel opening, generating a robust inward Na<sup>+</sup>/Ca<sup>2+</sup> current to depolarize *Kiss1<sup>ARH</sup>* neurons, activating T-type calcium (Cav3.1) channels to greatly increase *Kiss1<sup>ARH</sup>* neuronal excitability.

**Table 1. Primer Table**

| Gene Name<br>(encodes for)          | Accession<br>Number | Primer        |           | Product<br>Length (bp) | Annealing<br>Temp (°C)            | Efficiency |                |     |
|-------------------------------------|---------------------|---------------|-----------|------------------------|-----------------------------------|------------|----------------|-----|
|                                     |                     | Location (nt) |           |                        |                                   | Slope      | r <sup>2</sup> | %   |
| <i>Kiss1</i> (Kiss1) <sup>a,b</sup> | NM_178260           | 64-80         | (exon 1)  | 120                    | 57 <sup>a</sup> , 60 <sup>b</sup> | -3.410     | 0.989          | 97  |
|                                     |                     | 167-183       | (exon 2)  |                        |                                   |            |                |     |
| <i>Stim1</i> (STIM1) <sup>a</sup>   | NM_009287           | 797-816       | (exon 2)  | 204                    | 59                                |            |                |     |
|                                     |                     | 981-1000      | (exon 3)  |                        |                                   |            |                |     |
| <i>Stim1</i> (STIM1) <sup>b</sup>   | NM_009287           | 821-839       | (exon 2)  | 135                    | 60                                | -3.311     | 0.977          | 100 |
|                                     |                     | 937-955       | (exon 3)  |                        |                                   |            |                |     |
| <i>Stim2</i> (STIM2) <sup>a</sup>   | NM_001363348        | 620-638       | (exon 2)  | 172                    | 59                                |            |                |     |
|                                     |                     | 773-791       | (exon 4)  |                        |                                   |            |                |     |
| <i>Stim2</i> (STIM2) <sup>b</sup>   | NM_001363348        | 1784-1803     | (exon 11) | 131                    | 60                                | -3.439     | 0.993          | 95  |
|                                     |                     | 1895-1914     | (exon 12) |                        |                                   |            |                |     |
| <i>Gapdh</i> (GAPDH) <sup>b</sup>   | NM_008084           | 689-706       | (exon 4)  | 93                     | 60                                | -3.352     | 0.998          | 99  |
|                                     |                     | 764-781       | (exon 5)  |                        |                                   |            |                |     |
| <i>Trpc4</i> (TRPC4) <sup>a,b</sup> | NM_016984           | 1888-1907     | (exon 6)  | 116                    | 60                                | -3.318     | 0.940          | 100 |
|                                     |                     | 1984-2003     | (exon 7)  |                        |                                   |            |                |     |
| <i>Trpc5</i> (TRPC5) <sup>a</sup>   | NM_009428           | 2206-2227     | (exon 6)  | 131                    | 63                                |            |                |     |
|                                     |                     | 2315-2336     | (exon 7)  |                        |                                   |            |                |     |
| <i>Trpc5</i> (TRPC5) <sup>b</sup>   | NM_009428           | 734-753       | (exon 2)  | 118                    | 60                                | -3.161     | 0.953          | 100 |
|                                     |                     | 832-851       | (exon 3)  |                        |                                   |            |                |     |

<sup>a</sup>primers for scRT-PCR.

<sup>b</sup>primers for qPCR.

**Figure 2-video supplement 1. Neurokinin B receptor agonist senktide induces [Ca<sup>2+</sup>]<sub>i</sub> increase in Kiss1<sup>ARH</sup> neurons expressing GCaMP6s.** Imaging of transient Ca<sup>2+</sup> changes in an arcuate slice using spinning disk confocal microscopy. Fluorescence intensity was measured over 20 minutes, before and after application

980 of senktide (1  $\mu$ M). The period represented is 20 minutes.

981  
982 **Figure 3-video supplement 1. High frequency photo-stimulation induces a slow excitatory postsynaptic**  
983 **potential (slow EPSP).** Slow EPSP was induced by a 10-s 20 Hz photostimulation (light intensity 0.9 mW and  
984 pulse duration, 10 ms) in a ChR2-expressing Kiss1<sup>ARH</sup> neuron in a slice from a *Kiss1<sup>Cre</sup>::Ai32* mouse. The period  
985 represented is 1 minute, 34 seconds.
